## Prevention and Treatment of Pediatric Obesity: An Endocrine Society Clinical Practice Guideline Based on Expert Opinion

Gilbert P. August, Sonia Caprio, Ilene Fennoy, Michael Freemark, Francine R. Kaufman, Robert H. Lustig, Janet H. Silverstein, Phyllis W. Speiser, Dennis M. Styne, and Victor M. Montori

Professor Emeritus of Pediatrics, George Washington University School of Medicine (G.P.A.), Washington, D.C. 20037; Yale University School of Medicine (S.C.), New Haven, Connecticut 06510; Columbia University (I.F.), New York, New York 10027; Duke University Medical Center (M.F.), Durham, North Carolina 27710; Children's Hospital of Los Angeles (F.R.K.), Los Angeles, California 90027; University of California San Francisco (R.H.L.), San Francisco, California 94143; University of Florida (J.H.S.), Gainesville, Florida 32611; Schneider Children's Hospital (P.W.S.), New Hyde Park, New York 11040; University of California–Davis Medical Center (D.M.S.), Sacramento, California 95817; and Mayo Clinic (V.M.M.), Rochester, Minnesota 55905

**Objective:** Our objective was to formulate practice guidelines for the treatment and prevention of pediatric obesity.

**Conclusions:** We recommend defining overweight as body mass index (BMI) in at least the 85th percentile but < the 95th percentile and obesity as BMI in at least the 95th percentile against routine endocrine studies unless the height velocity is attenuated or inappropriate for the family background or stage of puberty; referring patients to a geneticist if there is evidence of a genetic syndrome; evaluating for obesity-associated comorbidities in children with BMI in at least the 85th percentile; and prescribing and supporting intensive lifestyle (dietary, physical activity, and behavioral) modification as the prerequisite for any treatment.

We suggest that pharmacotherapy (in combination with lifestyle modification) be considered in: 1) obese children only after failure of a formal program of intensive lifestyle modification; and 2) overweight children only if severe comorbidities persist despite intensive lifestyle modification, particularly in children with a strong family history of type 2 diabetes or premature cardiovascular disease. Pharmacotherapy should be provided only by clinicians who are experienced in the use of antiobesity agents and aware of the potential for adverse reactions. We suggest bariatric surgery for adolescents with BMI above 50 kg/m<sup>2</sup>, or BMI above 40 kg/m<sup>2</sup> with severe comorbidities in whom lifestyle modifications and/or pharmacotherapy have failed. Candidates for surgery and their families must be psychologically stable and capable of adhering to lifestyle modifications. Access to experienced surgeons and sophisticated multidisciplinary teams who assess the benefits and risks of surgery is obligatory.

We emphasize the prevention of obesity by recommending breast-feeding of infants for at least 6 months and advocating that schools provide for 60 min of moderate to vigorous daily exercise in all grades. We suggest that clinicians educate children and parents through anticipatory guidance about healthy dietary and activity habits, and we advocate for restricting the availability of unhealthy food choices in schools, policies to ban advertising unhealthy food choices to children, and community redesign to maximize opportunities for safe walking and bike riding to school, athletic activities, and neighborhood shopping. (*J Clin Endocrinol Metab* 93: 4576–4599, 2008)

0021-972X/08/\$15.00/0

Printed in U.S.A.

Copyright © 2008 by The Endocrine Society

doi: 10.1210/jc.2007-2458 Received November 5, 2007. Accepted August 29, 2008.

First Published Online September 9, 2008

Abbreviations: ALT, Alanine aminotransferase; BMI, body mass index; HDL, high-density lipoprotein; HOMA, homeostasis model assessment; IR, insulin resistance; LAGB, laparoscopic adjustable gastric banding; LDL, low-density lipoprotein; NAFLD, nonalcoholic fatty liver disease; PCOS, polycystic ovary disease; RYGB, Roux-en-Y gastric bypass; T2DM, type 2 diabetes mellitus.

## METHOD OF DEVELOPMENT OF EVIDENCE-BASED GUIDELINES

The Clinical Guidelines Subcommittee of The Endocrine Society identified pediatric obesity as a priority area requiring practice guidelines and appointed a Task Force to formulate evidence-based recommendations.

Accordingly, the purpose of these guidelines is to summarize information concerning:

- The seriousness of pediatric obesity and overweight.
- The diagnostic criteria.
- The available treatments and when to apply them.
- The available measures to prevent overweight and obesity.

The Task Force elected to use the Grading of Recommendations Assessment, Development, and Evaluation (GRADE) method proposed by an international group with expertise in development and implementation of evidence-based guidelines (1). The Task Force used systematic reviews of available evidence to inform its key recommendations, and consistent language and graphical descriptions of both the strength of recommendations and the quality of evidence. The strength of a recommendation is indicated by the number 1 (strong recommendation, associated with the phrase “we recommend”) or 2 (weak recommendation, associated with the phrase “we suggest”). The quality of the evidence is indicated by cross-filled circles, such that ⊕○○○ denotes very low quality, ⊕⊕○○ low quality, ⊕⊕⊕○ moderate quality, and ⊕⊕⊕⊕ high-quality evidence. A detailed description of this grading scheme has been published elsewhere (2).

Each *recommendation* is followed by a description of the *evidence*, the *values* that panelists considered in making the recommendation, and in some instances *remarks*, a section in which panelists offer either technical comments or caveats. These remarks usually reflect unsystematic observations and should be considered suggestions.

### Making strong recommendations with low-quality evidence

For many issues for which the evidence base is of low or very low quality, the Task Force, nonetheless, elected to make strong recommendations. As noted by Guyatt *et al.* (3), “The strength of any recommendation depends on the following two factors: the tradeoff between the benefits and risks and burdens; and the quality of the evidence regarding treatment effect....” A category 1 (strong) recommendation can be made when “the tradeoff is clear enough that most patients, despite differences in values, would make the same choice....” A category 2 (weak) recommendation is made when “the tradeoff is less clear, and individual patient values will likely lead to different choices...” (3).

We concur with the statement of Snow *et al.* (4): “Clinical practice guidelines are guides only and may not apply to all patients and all clinical situations. Thus, they are not intended to override clinicians’ judgment”. **Endocrine Society clinical guidelines are valid for 3 yr, after which time they are revised.**

### 1.0 The problem with obesity

*The objective of interventions in overweight and obese patients is the prevention or amelioration of obesity-related co-*

*morbidities, e.g. glucose intolerance and type 2 diabetes mellitus (T2DM), metabolic syndrome, dyslipidemia, and hypertension.*

The prevalence of obesity (BMI in the 95th percentile or above) increased almost 4-fold for 6- to 11-yr-old children and 3-fold for 12 to 19 yr olds between the surveys of 1963–1970 and 1999–2000 (5). For infants (0–23 months), the increase was from 7.2% in 1976–1980 to 11.6%; for 2 to 5 yr olds, the increase was from 5 to 13.9% during this time (6). Although rates vary among different ethnic groups, the overall prevalence of childhood obesity is 17.1% (7). The standards for weight and BMI percentiles are derived from the data of National Health and Nutrition Examination Survey (NHANES) II (1976–1980) and National Health Examination Survey (NHES) I (1963–1965) and II (1966–1970), when children were leaner.

The prevalence of overweight (BMI ≥ 85th but < 95th percentile) in the same period increased by 2.5-fold to 37.2% in boys and girls older than 6 yr of age. Exact rates vary according to ethnicity (6).

The prevalence of pediatric obesity varies according to ethnicity, with especially high rates among Mexican-Americans and African-Americans. The role of poverty, although tending to be associated with a higher prevalence of obesity, is inconsistent across ethnicity and gender (8).

### 1.1 Association with adult disease

This increased prevalence is particularly important because childhood overweight and obesity are **predictive of adult overweight and obesity**. After adjusting for parental obesity, the odds ratio for a BMI > 27.8 kg/m<sup>2</sup> for men and > 27.3 kg/m<sup>2</sup> for women aged 21–29 yr increased from 1.3 when children aged 1–2 yr had a BMI > the 85th percentile to an odds ratio of 17.5 when children aged 15–17 yr had a BMI > the 85th percentile (9). The results are similar when looking at overweight adults at age 35 yr compared with childhood BMIs at the 75th, 85th, and 95th percentiles (10, 11). A BMI in the 85th percentile or above during the preschool and elementary school years is associated with a significantly increased risk of overweight in adolescents (12).

A major concern regarding the increased prevalence of obesity is its association with cardiovascular risk factors. Autopsy studies show the presence of not only fatty streaks but also fibrous plaques in the aorta and coronary arteries of obese teenagers (13, 14). The prevalence of **cardiovascular risk factors** [hypertriglyceridemia, high low-density lipoprotein (LDL) cholesterol, low high-density lipoprotein (HDL) cholesterol, hyperinsulinemia, and hypertension] increases with the rise in BMI. For children and adolescents with a BMI between the 85th and 94th percentiles, 19% had two or more cardiovascular risk factors and 5% had three or more. When the BMI was in the 95th percentile or above, 39% had two or more risk factors and 18% had three or more. When the BMI was in the 99th percentile or above, 59% had two or more cardiovascular risk factors and 33% had three or more (15).

The presence of cardiovascular risk factors during childhood can lead to an increased incidence of fatal and nonfatal cardiac events in adulthood (16). In this study, a cohort of 276,835 children aged 7–13 yr was followed into adult ages of 25–60 yr; 10,235 men and 4,318 women suffered either a fatal or a non-

fatal cardiovascular event. The risk of a cardiovascular event was associated with the BMI of boys aged 7–13 and girls aged 10–13 yr. The relative risk of an event was apparent even with an increase in BMI z-score of just 1 U. For this Danish population of children, a BMI z-score of zero was equivalent to the 44th percentile on the Centers for Disease Control and Prevention (CDC) BMI charts, and a z-score of +1 was equivalent to the 88th percentile. For boys whose BMI z-score was +1, the relative risk of an adult cardiovascular event increased from 1.06 at 7 yr of age to 1.17 at 13 yr of age. For girls, the relative risk increased from the nonsignificant relative risk of 1.02 at 7 yr to a significant 1.12 at 13 yr. This study illustrates the deleterious effects of even a moderate increase in body weight during childhood and pinpoints the ages between 7 and 13 yr as one of the critical periods for intervention and prevention of overweight and obesity (16).

### 1.2 Pediatric obesity-associated comorbidities

Concomitant with the greater prevalence of childhood obesity, the prevalence of T2DM has increased in children and adolescents (17). T2DM now accounts for 20% of diabetes in children aged 10–19 yr (18).

Overweight and obese individuals are at increased risk for **dyslipidemia**, most commonly a low HDL cholesterol. Lipid abnormalities were found in 12–17% of overweight and obese children (19).

The overall prevalence of the **metabolic syndrome** (a constellation of cardiovascular risk factors, comprising abdominal obesity and two or more of the following: elevated triglycerides, low HDL cholesterol, high blood pressure, increased plasma glucose) (20–22) among 12 to 19 yr olds in the United States is about 4.2% (23). The risk of the metabolic syndrome is nearly 50% in severely obese (BMI  $\geq$  40.6 kg/m<sup>2</sup>) adolescents (24).

**Acanthosis nigricans** is associated with both T2DM and insulin resistance (IR), but the strongest correlation is with obesity (25). The prevalence of acanthosis nigricans is greater in African-Americans (51%) than in Caucasians (8%) (25). **Skin tags** are also associated with T2DM (26).

Obesity, BMI in at least the 95th percentile, is associated with **hyperandrogenemia** and **hyperinsulinism** in pre- to midpubertal girls. Free testosterone concentrations in such girls are higher than in girls with a BMI below the 85th percentile (27). Taken together, these abnormalities place the obese adolescent girl at risk for **polycystic ovary disease (PCOS)**, which, in turn, is exacerbated by obesity.

**Systolic blood pressure** correlates with BMI, skinfold thickness, and waist-to-hip ratio in children and adolescents (28). Normal values for blood pressure are standardized to the child's height percentile (29). For children with BMI in the 85th–94th percentile, a blood pressure > 95th percentile ranged from 6.6% at 2–5 yr to 13.3% at 16–19 yr for males; for females, the range was 4.4% at 2–5 yr to 16.3% at 16–19 yr of age (30). The relative risk for hypertension in obese children (BMI  $\geq$  95th percentile) was 3.26 after three consecutive blood pressure screenings (31).

There is a 10-fold increase in obesity-related glomerulosclerosis among adults (32). Morbidly obese adolescents have also been diagnosed with proteinuria and **focal segmental glomeru-**

**losclerosis (FSGS)**, which may progress to end-stage renal disease or remit with weight loss (33).

Obese children are up to six times more likely than lean children to have **obstructive sleep apnea** (34). Obstructive sleep apnea is independently related to the development of hypertension, cardiovascular diseases, behavioral disorders, poor school performance in children, and poor quality of life in adults (35).

The prevalence of **nonalcoholic fatty liver disease (NAFLD)** is unclear and depends on the detection method. Between 10 and 25% of obese children have elevated transaminases, primarily alanine aminotransferase (ALT); as the degree of obesity increases, so does the prevalence of an elevated ALT. Abdominal sonography can detect a fatty liver, which is also associated with a greater BMI, in 52% of obese children. In an autopsy study, the incidence of fatty liver was 38% in obese children 2–19 yr of age (36). Morbidly obese children are particularly prone to fatty liver. Obese Hispanic children have a higher incidence of NAFLD. Weight reduction is an effective treatment for NAFLD (37). Although a benign clinical course is typical of NAFLD, it may be associated with increasing fibrosis and, rarely, progression to cirrhosis (38).

Obesity is a major risk factor for **gallstones**, which were found in 2% of obese children with a BMI > 30 kg/m<sup>2</sup> compared with an incidence of only 0.6% in nonobese children (39). Additional risk factors for gallstone development are the metabolic syndrome, hyperinsulinemia, and rapid, significant weight loss (40).

Excess weight is associated with **slipped capital femoral epiphysis, genu valgum, tibia vara (Blount disease), flat kneecap pressure/pain, flat foot, spondylolesthesis (low back pain), scoliosis, and osteoarthritis** (41).

The prevalence of **pseudotumor cerebri** increases 15-fold with increasing BMI. The risk of intracranial hypertension is not related to the degree of obesity and is increased even in individuals who are just 10% above ideal body weight (41).

**Psychosocial problems** may become an issue for many overweight and obese children and adolescents (42).

### 1.3 Remarks

Although not a comorbidity *per se*, an **earlier onset of pubarche and thelarche** is associated with an elevated BMI (43, 44). Whether it is also associated with an earlier onset of menarche is controversial, a question that has been extensively reviewed (45). There is, however, increasing evidence that premature pubarche is linked to the elements of the metabolic syndrome and to polycystic ovarian disease (46, 47). These children and adolescents require close observation as they mature into early adulthood.

## 2.0 Diagnosis of overweight and obesity

### 2.1 Recommendation

*We recommend the use of BMI [calculated as weight in kilograms divided by height in meters squared], with CDC-derived normative percentiles, as the preferred method for the diagnosis of the overweight or obese child* (48) (1⊕⊕⊕⊕).

## 2.1 Evidence

Although various techniques are available to measure body fat, many are impractical for clinical use. BMI was adopted as the international standard clinical measure of adiposity (49).

An increased BMI is related to morbidity and mortality in adults, even if there is imprecision as to the relationship of BMI values to body fat content. Following its widespread use in adults, BMI is now accepted as the standard in children (8). However, the use of BMI in children is more complex than in adults. The BMI standard percentile distribution changes with an individual's age, sex, and, in some populations, ethnicity—thus limiting the utility of the international standard BMI charts for age (50).

## 2.1 Values and preferences

The Task Force placed a high value on the identification of children and adolescents with high BMI to enable targeting recommended clinical interventions to those individuals and placed a relatively lower value on avoiding the potential psychological and socioeconomic consequences (e.g. labeling and medicalization) of such practice.

## 2.1 Remarks

Although not ideal, the BMI is the internationally recognized standard for the definition of overweight and obesity, and the CDC standard curves are the most readily available standards for American children. The Task Force elected not to recommend another standard without higher quality evidence.

Stunted populations (51) may have an increased BMI without increased body fat. Taller individuals may have a high BMI even if their body proportions are equivalent to those of shorter individuals (52). In individuals who are not unusually short or tall, a high BMI is likely to predict abnormally high body fat content. However, a normal BMI does not always exclude the presence of increased body fat or increased risk of obesity-associated comorbidities (see 2.2 Remarks). Fat tissue and BMI increase naturally with pubertal progression in girls (53), so that matching the value to chronological age may be misleading if the child progresses through puberty outside the average age range.

Much research has focused on using the **waist circumference** or **waist-to-height ratio** as a marker of obesity (54–58), as well as an additional marker for IR (23, 54, 59–61). This approach has the advantage of taking into account body fat distribution and the greater cardiovascular risk associated with visceral fat (62). Waist circumference standards for American children of various ethnic groups are available (63). Waist circumference should be recorded because future research may prove this measure to reflect fatness or morbidity better.

BMI (weight in kilograms divided by height in meters squared) is plotted according to the standardized CDC growth charts for the United States (48). Waist circumference is measured at the level of the iliac crest and interpreted according to age, sex, and racial standards (63).

## 2.2 Recommendation

*We recommend that a child be diagnosed as overweight if the BMI is at least in the 85th percentile but < the 95th percentile and*

*obese if the BMI is at least in the 95th percentile for age and sex (1⊕○○○).*

## 2.2 Evidence

Adults experience increased morbidity and mortality when the BMI rises over 30 kg/m<sup>2</sup>, which is about the 95th percentile of BMI at 19½ yr of age (64). Clinicians caring for children can use curves generated by tracing the progression of BMI values for age back from the various percentiles at this older age to determine, in an age-adjusted manner, what BMI is equivalent to 25 or 30 kg/m<sup>2</sup> for an adult. Although these cutoffs are not derived from pediatric data, some experts consider them to be relevant indicators of health and morbidity (65, 66), but others do not (67).

## 2.2 Remarks

The BMI may be particularly imprecise in children younger than 4 yr of age (see 2.1 Remarks). Thus, clinicians may consider resorting to the available weight and height percentile charts. An increase in weight percentile that is out of proportion to the increase in height percentile should be a warning sign.

Data indicate that individuals of Asian and Native American ethnicity have a greater susceptibility to obesity-associated comorbidities at a lower BMI than other ethnicities. An adult BMI of at least 23 kg/m<sup>2</sup> was associated with an increased risk of obesity-associated comorbidities, and a BMI of at least 27.5 kg/m<sup>2</sup> represented high risk (68, 69). There are also differences in the BMI and waist circumference cut-points for Mexican-Americans, African-Americans, and whites in relation to the likelihood of having a cardiovascular disease risk factor (70). These discrepancies may also apply to children of different ethnic groups, although no long-term data are available as yet. Currently, there are insufficient data to recommend modifying the definition of either overweight or obesity in Asian or Native American children or adolescents.

## 2.3 Recommendation

*We recommend against a routine laboratory evaluation for endocrine causes of obesity in obese children or early to midpubertal obese adolescents unless the child's height velocity, assessed in relation to stage of puberty and family background, is attenuated (1⊕⊕○○).*

## 2.3 Evidence

GH deficiency and other forms of hypopituitarism, hypothyroidism, Cushing disease or syndrome, or pseudohypoparathyroidism are associated with increased BMI, but stature and height velocity are decreased, unless there is pubertal acceleration in height velocity. By contrast, stature and height velocity are usually increased with exogenous obesity. Testing for endocrine disorders is unlikely to be useful unless the patient is short in relation to the family's background or is showing a deceleration in height velocity (71).

There are two uncommon circumstances in which the above rule may seem to be invalid. First is an adrenal tumor with concomitant hypersecretion of androgens and cortisol, but a careful physical examination should reveal signs of virilization. Second



is the condition termed “growth without growth hormone” (72). It is rare in patients with idiopathic isolated GH deficiency or idiopathic combined pituitary hormone deficiencies. It can occur in patients whose panhypopituitarism follows removal of a craniopharyngioma or other suprasellar tumor or who have some other central nervous system abnormality. In 2003, five additional patients with this condition and panhypopituitarism were reported (73). These particular patients were not obese and presented with such features of pituitary deficiency as small penis and delayed puberty.

**Hypothalamic obesity** may be a related condition because it is associated with central nervous system insult with hypothalamic damage, which may lead to decreased energy expenditure and excessive caloric intake. It is not amenable to most lifestyle alterations (74) (see 3.2 *Evidence* for discussion of octreotide).

### 2.3 Remarks

Deceleration in height velocity can be demonstrated either by using a height velocity curve normalized for age and/or stage of puberty or by observing that the patient is crossing major height percentile lines downward on the standardized height attainment charts (48). Because these height attainment charts are standardized for age and not for stage of puberty, they can be misleading in children with delayed or precocious puberty. Height attainment and velocity charts that have the growth patterns not only of average-maturing children but also of early-maturing and late-maturing children are available (75). Early- and late-maturing children represented on these curves are within the normal variation for the onset of puberty. Children demonstrating either true precocious or true delayed puberty deserve a full evaluation.

### 2.4 Recommendations

2.4.a *We recommend referral to a geneticist for children whose obesity has a syndromic etiology, especially in the presence of neurodevelopmental abnormalities* (1⊕○○○).

2.4.b *We suggest that parents of children who have inexorably gained weight from early infancy and have risen above the 97th percentile for weight by 3 yr of age be informed of the availability of MC4R genetic testing. However, the test is positive in only 2%–4% of such patients who are above the 97th percentile for weight* (71) *and currently will not alter treatment* (2⊕○○○).

### 2.4 Evidence

The more common genetic syndromes associated with obesity are also associated with neurodevelopmental abnormalities (Online Mendelian Inheritance in Man, available at: <http://www.ncbi.nlm.nih.gov/omim/>). Children with the various forms of Turner syndrome or SHOX deletions (76), however, are most often developmentally normal and may have few, if any, stigmata. Although it is attractive to postulate that human obesity is attributable to a single mutation or group of mutations in candidate genes with prominent roles in the appetite and fuel metabolic pathways, it is likely that most obesity is caused by the accumulation of polymorphisms in multiple genes with relatively small effects on weight gain or quantitative trait loci (77, 78).

This concept is supported by a genome-wide scan in participants in the Framingham Heart Study demonstrating that a common polymorphism in a cholesterol-regulating gene is associated with obesity (79).

### 2.4 Values and preferences

In making the recommendation for referral to a geneticist, the Task Force placed a higher value on the identification of genetic disorders that will provide an explanation of the individual's overweight problem, offer prognostic implications, and spare the family from feelings of guilt that often occur when traditional weight loss interventions are unsuccessful. We also placed a lower value on avoiding the downsides of genetic consultation, namely cost, labeling, and false-positive results of testing, when this referral is carefully limited to individuals with a syndromic etiology of obesity.

### 2.5 Recommendation

*We recommend that children with a BMI in at least the 85th percentile be evaluated for associated comorbidities and complications* (Table 1 and Fig. 1) (1⊕○○○).

### 2.5 Evidence

In *Section 1.1*, we discussed the evidence for the increased prevalence of comorbidities that are associated with a BMI in at least the 85th percentile. Of most concern are the cardiovascular risk factors (hypertriglyceridemia, increased LDL cholesterol, decreased HDL cholesterol, increased fasting blood glucose, and hypertension) predictive of future cardiovascular disease or T2DM or both. Thus, a large enough number of overweight children with a cardiovascular risk factor exist to warrant screening them, as well as obese children. Measurement of ALT is of more importance as the BMI increases into the obese range (discussed in *Section 1.2*).

### 2.5 Values and preferences

We placed a relatively high value on the identification of weight-related complications and comorbidities because this simultaneously focuses our limited treatment resources on those who, as a group, could accrue the greatest potential benefits of treatment and allows the identification and management of common and potentially important conditions. This recommendation places a lower value on avoiding medicalization and its costs and consequences.

### 2.5 Remarks

The medical history should assess the risk factors for the development of pediatric obesity including maternal diabetes, small for gestational age, large for gestational age, parental obesity (maternal is more important than paternal), early adiposity rebound (9, 82, 83), maternal weight gain during pregnancy, breast-feeding duration, weight of siblings and more distant relatives, possible consanguinity, as well as all other aspects of a standard pediatric history.

The medical history should also assess the presence of snoring and other manifestations of sleep apnea; polyuria, polydipsia, or weight loss (diabetes); and, in pubertal girls, acne, hirsutism (in-

**TABLE 1.** Screening tests for the more common obesity comorbidities

| Comorbidity                                             | Case detection tests (abnormal values) <sup>a</sup>                                                                                                                                                                                                                                                                                                                  |
|---------------------------------------------------------|----------------------------------------------------------------------------------------------------------------------------------------------------------------------------------------------------------------------------------------------------------------------------------------------------------------------------------------------------------------------|
| Prediabetes                                             |                                                                                                                                                                                                                                                                                                                                                                      |
| Impaired fasting plasma glucose (verify fasting status) | Fasting plasma glucose (>100 mg/dl)                                                                                                                                                                                                                                                                                                                                  |
| Impaired glucose tolerance (if OGTT is used)            | 2-h glucose > 140 but < 200 mg/dl                                                                                                                                                                                                                                                                                                                                    |
| Diabetes mellitus                                       | Fasting plasma glucose > 126 mg/dl, or random value > 200 mg/dl (if OGTT used, 2-h glucose > 200)<br>If asymptomatic, must have repeat abnormal values on another occasion                                                                                                                                                                                           |
| Dyslipidemia                                            | Fasting (12–14 h) lipids<br>Triglycerides: >110 mg/dl (75th percentile); ≥160 mg/dl (90th percentile)<br>LDL cholesterol: ≥110 mg/dl (75th percentile); ≥130 mg/dl (90th percentile)<br>Total cholesterol: ≥180 mg/dl (75th percentile); ≥200 mg/dl (90th percentile)<br>HDL cholesterol: ≤35 mg/dl (10th percentile); ≤40 mg/dl (25th percentile) (80) <sup>b</sup> |
| Hypertension                                            | Blood pressure > 90th percentile (standardized according to sex, age, and height percentile) (29)                                                                                                                                                                                                                                                                    |
| NAFLD                                                   | ALT > 2 SD above the mean for the laboratory                                                                                                                                                                                                                                                                                                                         |

OGTT, Oral glucose tolerance test.

<sup>a</sup> To convert mg/dl to mmol/liter, multiply by 0.0555 for glucose, 0.0259 for cholesterol, and 0.0113 for triglycerides.<sup>b</sup> A proposed refinement of these abnormal lipid levels has the potential advantage of linking adolescents' lipid levels to those of adults (81).

cluding the recent use of hair removal techniques that would mask the degree of hirsutism at the time of the examination), and onset and frequency of menses (PCOS). Note the use of antipsychotics associated with weight gain such as clozapine, risperidone, olanzapine, and quetiapine.

Although the various techniques assessing dietary intake are unreliable and subject to error (84), it is still important to estimate the type and quantity of beverage intake, frequency of dining out and where, and frequency and type of snacks, among other dietary issues. The efficacy of food frequency and activity questionnaires is discussed in a 2007 review (85). Activity history includes the duration, the frequency, and an estimate of the degree of difficulty of exercise performed during school and at-home days, including participation in sports teams or other activities, walking to school and stores, *etc.* Estimates of screen time (*i.e.* time in front of a computer, playing video games, or viewing TV) per day may be useful. An environmental history includes safety of parks and neighborhoods and availability of playground equipment, gyms, and pools. All of this information is needed to develop an action plan.

Physical findings should include: 1) waist circumference at the level of the iliac crest and interpreted according to age, sex, and racial standards (63); 2) blood pressure, using height percentile-normalized blood pressure tables to interpret the findings (29); 3) acanthosis nigricans and skin tags; 4) severe acne and hirsutism in pubertal age girls; 5) tenderness and range of motion of the knee, leg, or foot; and 6) peripheral edema. Physical findings associated with syndromic obesity should be identified, particularly if there is a neurodevelopmental abnormality.

Suggested screening tests are listed in Table 1. Other tests may be pertinent when other findings suggest sleep apnea (a sleep study, electrocardiogram, echocardiogram) or PCOS (serum testosterone, SHBG, dehydroepiandrosterone sulfate, 17-hydroxyprogesterone, and third generation LH and FSH). Testosterone assays in the range found in women and children may be imprecise (86, 87).

The fasting insulin is an optional test to quantify IR by calculation of homeostasis model assessment of insulin resistance (HOMA-IR) or by noting that the fasting insulin is more than 2 SD above the mean for the laboratory doing the test. There is growing evidence for the association of IR with the development of T2DM in children (88, 89). Most of these children and adolescents are obese (90). Identification of children with IR has been proposed as a strategy for identifying high-risk children for targeted diabetes prevention. The gold standard for measuring IR, the hyperinsulinemic-euglycemic clamp, is labor intensive and expensive and, therefore, not recommended for clinical use. A surrogate marker of IR is the HOMA-IR index, based on the measurement of fasting insulin and glucose with higher levels representing greater degrees of IR [HOMA-IR = (fasting insulin in  $\mu\text{U/ml}$   $\times$  fasting glucose in mmol/liter) divided by 22.5] (91). In nondiabetic children, HOMA-IR correlates as high as 0.91 with clamp measures (92, 93). Based on a study of 1,802 adolescents aged 12–19 yr from the 1999–2002 NHANES, a HOMA-IR > 4.39 was recommended as evidence for IR (90). On the basis of that criterion, roughly 46–52% of the adolescents with a BMI in at least the 95th percentile were insulin resistant; roughly 11–16% of those with a BMI in at least the 85th percentile but below the 95th percentile were insulin resistant; and only 4% of those with a BMI below the 85th percentile were insulin resistant (90). In a study of Mexican children aged 10–14 yr, very similar results were obtained, with 3, 12, and 47% of the children insulin resistant at BMIs below the 85th percentile, at least the 85th but below the 95th percentile, and at least the 95th percentile, respectively (94). In a study of Australian children aged 6–13 yr (95), increasing BMI z-score was continuously associated with complications of overweight in children. Even in the healthy weight range, there was a continuous linear or curvilinear association between increasing BMI z-score and comorbid risk factors. But there was a subset of children in whom there was no evidence of hyperinsulinism, even at BMI z-scores of +1 to +3. Conversely, some children had evidence for hyperinsulinism although their BMI z-scores ranged from –2 to 0.

The use of any index of IR is complicated by concerns about the lack of standardized measures for the quantification of insulin (96), by the need to be assured that the blood sample is obtained in a truly fasting state, and by the increase in IR from

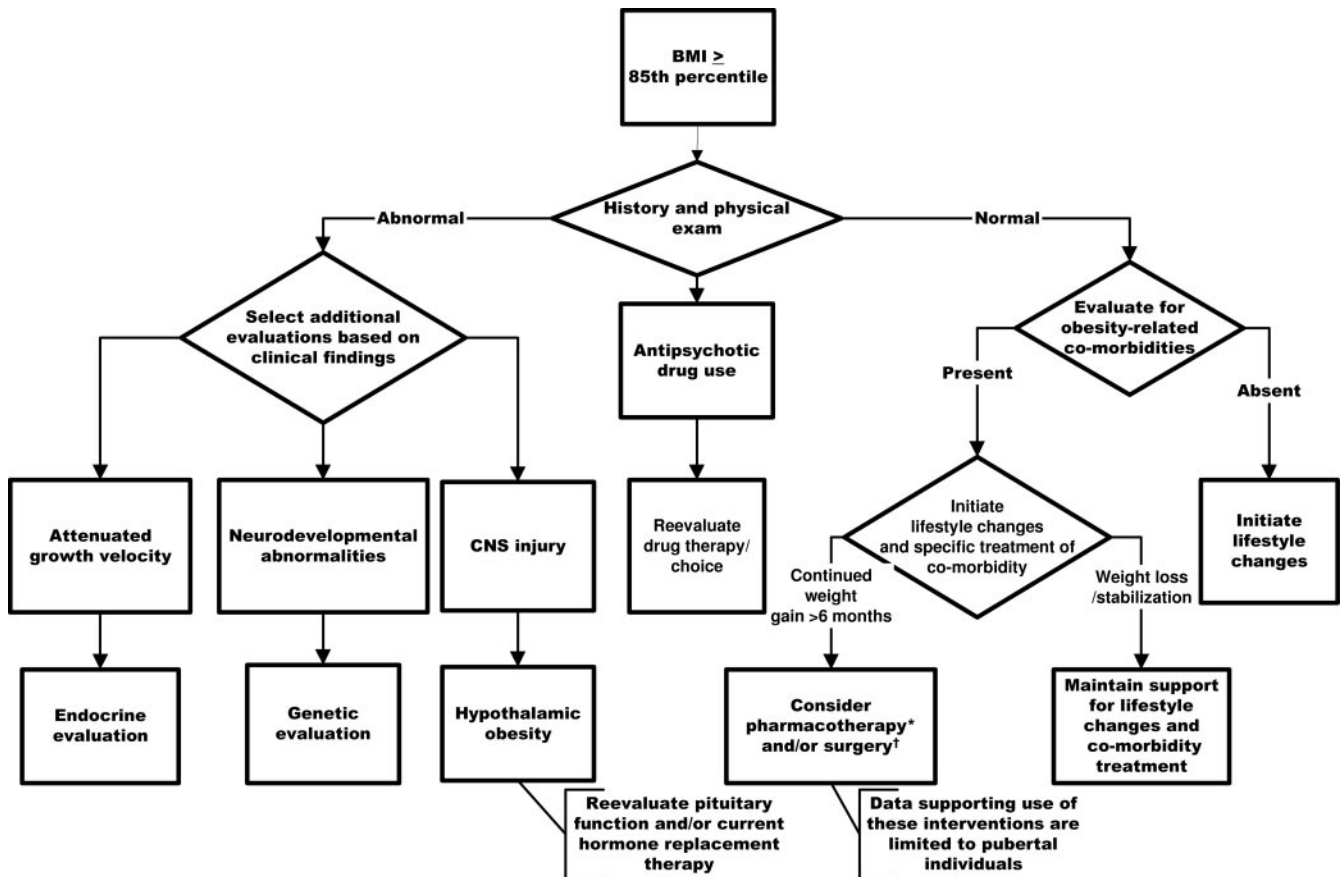

Fig. 1. Diagnosis and management flow chart. \*, See Section 3.2 and the Table 2 legend for criteria for the selection of candidates for pharmacotherapy. †, See Section 3.3 for criteria for the selection of candidates for bariatric surgery.

stage 1 to stage 3 of puberty and then a decrease in IR from stage 3 until adulthood (97).

Assessment of HOMA-IR in overweight obese children and adolescents may represent an important strategy for improving the efficacy of treatment for weight loss and chronic disease prevention (98–100). Furthermore, measurement of fasting serum insulin or of HOMA-IR is not necessary to establish a need for weight control or weight loss, especially because the expense of the test limits its potential for broad use in IR screening.

### 3.0 Treatment of obesity

#### 3.1 Lifestyle recommendations: general considerations

##### 3.1.0 Recommendations

We recommend that clinicians prescribe and support intensive lifestyle (dietary, physical activity, and behavioral) modification to the entire family and to the patient, in an age-appropriate manner, and as the prerequisite for all overweight and obesity treatments for children and adolescents (1⊕○○○).

##### 3.1.0 Evidence

Successful weight management, through lifestyle interventions, confers important intermediate-term health benefits to adults such as reducing the incidence of T2DM (101) and improving cardiovascular fitness (102). Weight management pro-

grams in overweight children have also improved body composition and metabolic parameters (103, 104).

Unfortunately, it is commonly thought that lifestyle modification is not efficacious. Weight loss may not occur or, despite initial success, weight regain often begins after the active phase of the program has ended (105, 106).

A factor contributing to weight regain may be lack of a continued exercise program. The odds for weight regain are 2-fold greater in those patients who are sedentary (105). The importance of exercise in maintaining much of a person's weight loss was one of the conclusions of a meta-analysis of long-term (3- to 5-yr) weight maintenance studies (27.2% weight loss retention in the low exercise group and 53.8% weight loss retention in the high exercise group) (107). This meta-analysis also found that a weight loss of more than 20 kg in adults was associated with a greater degree of weight loss retention as compared with adults losing < 10 kg. Additional factors associated with weight regain include Mexican-American ethnicity *vs.* non-Hispanic whites (odds ratio, 2.0) and losing more than 20% of body weight *vs.* < 15% (odds ratio, 2.8) (105). Changes in hormone production and action may also play important roles (98). In socioeconomically disadvantaged families, weight control may not be an important priority when balanced against other problems they face.

Although the long-term outlook may appear bleak, some studies report long-term success in a significant subgroup of pa-

tients. The results of population surveys indicate that 25% of adults who had lost more than 10% of their body weight maintained their weight losses for more than 5 yr (108). In another population-based study of individuals who had completed a commercial weight loss program, 18.8% maintained a weight loss of 10% or greater for 5 yr, whereas 42.6% maintained a weight loss of 5% or greater for 5 yr; 19.4% maintained their weights within 5 lb of their original goals (109). In both papers, the authors opined that patients who seek out a health care setting have already tried and failed to lose weight through other means and may represent a more refractory population.

Other factors, besides high levels of physical activity, associated with successful weight maintenance included continued reduced caloric intake, reduced fat intake, and reduced fast food consumption (110). Certain psychological traits also are associated with successful weight loss maintenance (111, 112).

The success of lifestyle modification, at least in a reasonable portion of adults, has prompted its endorsement in guidelines from the U.S. Preventive Services Task Force (USPSTF). That group “recommends that clinicians screen all adult patients for obesity and offer intensive counseling and behavioral interventions to promote sustained weight loss...” (113). The USPSTF emphasizes the concept of intensive counseling, defined as at least one “person-to-person (individual or group) session per month for at least the first 3 months of the intervention” (113).

Emphasis should be on providing an intensive lifestyle modification program. This was most clearly shown by the results of a T2DM prevention trial in which one comparison was between the “standard lifestyle modification”—in which patients received the traditional written instructions about diet and exercise as well as an annual session discussing the importance of a healthy lifestyle—and an intensive plan covering diet, exercise, and behavior modification for the first 24 wk followed by monthly follow-up sessions. The initial goal was a 7% weight loss. The average weight loss in the standard lifestyle modification group was 0.1 kg and in the intensive modification group was 5.6 kg ( $P < 0.001$ ). Significant weight loss was maintained over the 4 yr of follow-up. The cumulative incidence of diabetes after 3 yr was 28.9% in the standard modification group and only 14.4% in the intensive modification group (114).

Although good-quality pediatric and adolescent data are scarce (115), there is sufficient evidence that intensive lifestyle modification programs, as in adults, can be an effective tool for pediatric weight control (104, 116). Furthermore, implementation of a formal maintenance program after the treatment phase is completed can be of added importance in maintaining achieved weight loss (116). This fits into a concept of obesity as a chronic disease (117).

A meta-analysis of randomized pediatric trials, commissioned by this Task Force, of combined lifestyle interventions (diet and exercise) for treating obesity showed a modest but significant effect on obesity (equivalent to a decrease in BMI of 1.5 kg/m<sup>2</sup>;  $P < 0.00001$ ) when these interventions targeted family involvement. There was a decrease in BMI of 0.4 kg/m<sup>2</sup> when parents were not specifically included and the effect on weight loss was not significant ( $P = 0.13$ ). Although the indirect comparison of effects across studies indicates that treatment is sig-

nificantly more effective when it targets the family ( $P$  value for the interaction was 0.04), the direct comparisons (within the same trial) were inconsistent across trials and showed no significant difference (118). These results suggest involving the family when delivering combined lifestyle interventions. Another meta-analysis that looked specifically at the effects of family-behavioral therapy produced parallel results (119).

An additional meta-analysis of randomized controlled trials of lifestyle interventions, but without an analysis of family involvement, also found moderate positive effects from the interventions when compared with no treatment, wait-list, or information-only controls. These effects persisted for an average follow-up period of 15 months (120). Although there was overlap with the meta-analysis we commissioned, each study contained reports not covered by the other.

An evidence-based position statement of the American Dietetic Association (ADA) supports the utility of family-based lifestyle interventions in children and of similar multicomponent programs for adolescents (121). These recommendations are consistent with the conclusions of an evidence-based review of pharmacological interventions for childhood obesity that highlighted the importance of concomitant intensive lifestyle interventions—dietary, exercise, and family counseling (98)—as well as by a combined CDC and American Medical Association expert committee (122).

### 3.1.0 Values and preferences

In making this recommendation (and other recommendations associated with specific lifestyle choices), the Task Force placed a relatively higher value on promoting lifestyle choices with their potential wide-reaching benefits and safety, and it placed a relatively lower value on avoiding the costs of implementation of lifestyle interventions with their potentially limited impact.

Although physicians generally strive to cure the great majority of their patients and may view a long-term success rate of 25% with despair, we should not retreat into a state of therapeutic nihilism. We are at a stage where we must treat overweight and obese patients, accept that perhaps only 25% may respond, but refine our techniques so that lifestyle modification will be effective in an increasing percentage of patients.

### 3.1.0 Remarks

Weight loss should be encouraged in patients with severe obesity and significant comorbidities. In this regard, a decrease in BMI of 1.5 kg/m<sup>2</sup>, as reported in the meta-analysis commissioned by the Task Force, may seem trivial, but if it is maintained over a longer term, overweight or minimally obese growing children and adolescents without comorbidities may benefit by simply maintaining weight; BMI will decline as linear growth proceeds, and lifestyle modification may reduce fat mass, increase lean body mass, and improve cardiovascular fitness (123). In the more severely obese or in physically mature patients, moderate weight loss of only 7% was associated with a decrease in the incidence of T2DM (114). This may be a more realistic goal for the severely obese (see 3.1.0 Evidence). Well-designed, randomized controlled studies of large numbers of patients, employing intensive lifestyle intervention and follow-up maintenance pro-



grams, are clearly needed to develop improved techniques. Some of the factors that should be addressed in such studies are described (115).

Successful lifestyle intervention and preventive measures are labor intensive, and even more so if there is a posttreatment maintenance program. The time spent in delivering intensive lifestyle interventions—direct contact with the patient and family (we cannot overemphasize the importance of family involvement) at least once a month for the first 3 months and comprising dietary and nutritional education, a physical activity prescription, and behavioral therapy—is poorly reimbursed, and thus there may be a disincentive to provide these services (Ref. 124, pp 221–227).

### 3.1.1 Dietary recommendations

3.1.1.a *We recommend that clinicians prescribe and support healthy eating habits such as:*

- *Avoiding the consumption of calorie-dense, nutrient-poor foods (e.g. sweetened beverages, sports drinks, fruit drinks and juices, most “fast food,” and calorie-dense snacks) (1⊕⊕○○).*

3.1.1.b *We suggest that clinicians prescribe and support*

- *Controlling caloric intake through portion control in accordance with the Guidelines of the American Academy of Pediatrics (<http://pediatrics.aappublications.org/cgi/reprint/117/2/544>) (2⊕○○○).*
- *Reducing saturated dietary fat intake for children older than 2 yr of age (2⊕⊕○○).*
- *Increasing the intake of dietary fiber, fruits, and vegetables (2⊕○○○).*
- *Eating timely, regular meals, particularly breakfast, and avoiding constant “grazing” during the day, especially after school (2⊕○○○).*

### 3.1.1 Evidence

Excessive intake of low-nutrient, calorie-dense, high-fat food, and sugar-sweetened beverages is a risk factor for obesity (125–127). Since 1965 teens have doubled their consumption of sugared soft drinks and fruit-flavored beverages. The average adolescent boy now consumes 50 ounces of such beverages per day (128). Reducing consumption of sugared beverages (e.g. soda, juices and fruit drinks, and sports drinks) (129, 130) may be an effective way to reduce ingested calories (131, 132). School-based interventions can reduce soda consumption and reduce weight in students at the highest BMI percentiles (133, 134).

Increased portion size parallels the increase in obesity (135, 136). Texas elementary schools are imparting portion control education using educational materials available from the Texas Department of Agriculture (<http://www.squaremeals.org/>).

Decreasing caloric intake by consuming more fruits and vegetables instead of dietary fat can decrease the risk of developing obesity and T2DM (134, 137). Most children do not meet the dietary recommendations needed to maintain a healthy weight and eat < half the recommended five fruits and vegetables a day

(138, 139). Inadequate consumption of dietary fiber may contribute to excessive weight gain (140).

Fast food accounted for only 2% of children’s total caloric intake in 1977–1978, but the proportion increased to 10% by 1994–1996 (141). Consumption of food prepared away from home increased from 18% of total calories in 1977–1978 to 32% in 1994–1996 (142). Overweight children are more likely to report eating fast food and to attend a school with vending machines selling chips and candy (143). Vending machine foods are sold separate from the National School Lunch Program and are currently exempt from the Dietary Guidelines; these food sales represent an increasing percentage of total school food sales (144).

Overweight children and adolescents are now more likely to skip breakfast and consume a few large meals per day (145, 146) than their leaner counterparts who are more likely to consume smaller, more frequent meals (147–149). Eating breakfast reduces snacking throughout the remainder of the day (150). One fourth to one third of the energy intake of adolescents is from snacks (151). Because snacks tend to be higher in calorie density than meals (152), frequent snacking is associated with high intake of fat, sugar, and calories (153, 154) and with overweight among children (155). Intervention studies to confirm a relationship between meal and snack patterns and overweight are needed.

### 3.1.1 Values and preferences

See description of values and preferences in *Section 3.1.0*.

### 3.1.1 Remarks

Many different diets have been proposed for weight loss. Currently there is debate about whether a low-fat (usually 30% of calories as fat) or a low-carbohydrate diet is more efficacious. A meta-analysis of randomized controlled studies in adults showed that the low-carbohydrate diet resulted in moderately greater weight loss by 6 months but not after 12 months (156). At the present time, there is insufficient pediatric evidence to warrant recommending any one hypocaloric diet over another. But caution should be exercised when using unbalanced hypocaloric diets that may be deficient in essential vitamins and minerals.

### 3.1.2 Physical activity recommendations

3.1.2.1 *We recommend that clinicians prescribe and support 60 min of daily moderate to vigorous physical activity (1⊕⊕○○).*

3.1.2.2 *We suggest that clinicians prescribe and support a decrease in time spent in sedentary activities, such as watching television, playing video games, or using computers for recreation. Screen time should be limited to 1–2 h per day, according to the American Academy of Pediatrics (182) (2⊕○○○).*

### 3.1.2.1 Evidence

In the absence of caloric restriction, moderate exercise does not generally cause weight loss. However, in combination with decreased caloric intake, exercise can achieve significant weight loss. Studies performed in the school setting have shown the beneficial effects of exercise in children and youth (157–161). The beneficial effects of both aerobic exercise and resistance

training can be short-lived, and exercise must be sustained. Time spent in daily vigorous exercise in excess of 60 min per day provides additional reduction in cardiovascular risk factors (162).

Physical fitness, even without weight loss, may offer some health benefits. Improvement in cardiovascular fitness was associated, in young adults, with improvement in cardiovascular disease risk factors over a 7-yr period (163).

School-based interventions have focused on reducing obesity rates (164–174). The Cardiovascular Health in Children (CHIC-I) study was able to improve physiological outcomes by decreasing body fat and cholesterol concentrations (168). The CHIC-II study was effective in reducing body fat and blood pressure in middle school youth (171). One of the main reasons the short-term CHIC interventions were successful in affecting physiological variables may be the increased time spent in actual moderate to vigorous physical activity in school (20 min in elementary schools and 30 min in middle schools). Both school design and adult supervision for physical activity have been shown to affect the amount of physical activity that 6th to 8th graders engage in during their free time (175). School systems are beginning to sponsor after-school lifetime fitness programs (176). Such pilot programs appear successful in controlling the rate of weight gain (177).

A meta-analysis of physical activity interventions, commissioned by this Task Force, found a moderate treatment effect when the outcome measure reflected body composition (e.g. fat percentage) ( $P = 0.00001$ ) and no effect when the outcome was BMI; the difference in results was highly significant ( $P = 0.002$ ). This would support the concept that exercise may affect cardiovascular risk factors by improving insulin sensitivity and adiposity, and by increasing lean body mass without affecting total body weight. However, there was no significant difference in responses in the six trials reporting both measures (118). This lack of a significant difference in responses may be due to there being no true difference, to chance [imprecision, *i.e.* there is a difference but the studies or the effects were not large enough to be detected (a type II error)], or to bias. This probably reflects reporting bias in which the significant outcome measure was more likely to be reported than an insignificant finding, such that when studies reported both measures the effect was similar.

### 3.1.2.1 Values and preferences

See description of values and preferences at *Section 3.1.0*.

### 3.1.2.1 Remarks

Although current recommendations state that schoolchildren (who spend about half their waking hours in school) should receive a minimum of 30 min of moderately vigorous physical activity each school day, only 8% of elementary schools and roughly 6% of junior and senior high schools provide physical education for the entire school year for all students and for all grades (Ref. 124, pp 237–284). Furthermore, only 10–30% of that time is spent in moderate to vigorous exercise. The limited support for physical education in the schools is unfortunate because exercise has been linked not only to cardiovascular benefits in children (178) but also to improvements in cognitive function and concentration (179, 180). School units on health and hygiene, in which children are taught about nutrition and good

health habits, have atrophied. An average of only 9 h is now spent on health education during the school year, although pilot studies have demonstrated the efficacy of curricula designed to reduce television-viewing time (Ref. 124, pp 237–318).

Moderate to vigorous exercise is defined as causing “some increase in breathing and heart rate usually associated (in a healthy person) with brisk walking, dancing, swimming, or cycling on flat terrain.” In exercise physiology terms, the energy expended is at least 3 (METs) metabolic equivalents (181).

As discussed under *3.1.0 Values and preferences* and *3.1.0 Remarks*, studies using either weight loss or BMI as an endpoint may miss the positive effects of exercise, such as shifting body composition from fat to muscle. The net weight loss under such circumstances may be nil.

### 3.1.2.2 Evidence

Activities involving TV, videotapes, video games, and computers average 5½ h per day (183, 184). An intervention to reduce TV viewing and meals eaten in front of the TV was successful in a comparatively high-socioeconomic-status population of ethnically homogeneous schoolchildren (185). Results of the meta-analysis, commissioned by the Task Force, of the three randomized trials of interventions focused on reducing sedentary activity were imprecise (*i.e.* consistent with both favorable and unfavorable impact on obesity outcomes) (118).

### 3.1.2.2 Values and preferences

See description of values and preferences at *Section 3.1.0*.

### 3.1.3 Psychosocial recommendations

3.1.3.a *We suggest that clinicians educate parents about the need for healthy rearing patterns related to diet and activity. Examples include parental modeling of healthy habits, avoidance of overly strict dieting, setting limits of acceptable behaviors, and avoidance of using food as a reward or punishment (2⊕○○○).*

3.1.3.b *We suggest that clinicians probe for and diagnose unhealthy intrafamily communication patterns and support rearing patterns that seek to enhance the child’s self-esteem (2⊕○○○).*

### 3.1.3 Evidence

The importance of involving the whole family, and not just the child, in treatment interventions is discussed in *Section 3.1.0*.

The role of parent-child interactions and parenting style in the development of unhealthy lifestyle habits is a subject of investigation (186, 187). An additional factor to overcome before any intervention may be the parents’ inability to recognize that their child is overweight, particularly for the preschool child (188).

### 3.1.3 Remarks

It is important to remember that clinician interactions with the family and all educational materials should be culturally sensitive and in the language best understood by the family.

### 3.2 Pharmacotherapy recommendations

3.2.a *We suggest that pharmacotherapy (in combination with lifestyle modification) be considered if a formal program of in-*

*tensive lifestyle modification has failed to limit weight gain or to mollify comorbidities in obese children. Overweight children should not be treated with pharmacotherapeutic agents unless significant, severe comorbidities persist despite intensive lifestyle modification. In these children, a strong family history of T2DM or cardiovascular risk factors strengthens the case for pharmacotherapy (2⊕○○○).*

3.2.b *We suggest that pharmacotherapy be offered only by clinicians who are experienced in the use of antiobesity agents and are aware of the potential for adverse reactions (2⊕○○○).*

### 3.2 Evidence

The utility of pharmacotherapy in adolescents has been reviewed (98, 189), and the use of medication to treat severe obesity can be an additional treatment modality (176, 190–192). Several limitations preclude physicians from early implementation of drug therapies. These include: 1) the lack of U.S. Food and Drug Administration (FDA) approval for use in preadolescents and younger adolescents; 2) reduced efficacy over time, with a plateau after 6 months of treatment due to reduced energy expenditure offsetting the decrease in energy intake—an effect also noted with hypocaloric diets (193); 3) the existence of a limited number of well-controlled studies of the safety and efficacy of pharmacological intervention in obese children; and 4) the need to weigh the relative risk of severe adverse events in children against the long-term potential for obesity-related morbidity and mortality. Despite these concerns, the negative health impact of childhood obesity may justify long-term medication, but only in combination with lifestyle modification (98, 176, 190–192).

Three pharmacotherapeutic agents—sibutramine, a nonselective reuptake inhibitor appetite suppressant that is most potent for serotonin and norepinephrine, but also blocks dopamine reuptake (194, 195); orlistat, which specifically inhibits intestinal lipase and can reduce fat and cholesterol absorption by approximately 30% (196); and metformin (not FDA approved for the treatment of obesity)—are most commonly used at present. Although metformin reduces hepatic glucose production and plasma insulin, inhibits lipogenesis, increases peripheral insulin sensitivity, and may reduce appetite by increasing levels of glucagon-like peptide (98), its mechanism of action on weight is unresolved. Only sibutramine (for children > 16 yr of age) and orlistat (for children > 12 yr of age) are FDA approved for the treatment of obesity in adolescents (Table 2).

The meta-analysis commissioned by the Task Force (118) showed that **sibutramine** demonstrated the most effect, with a decrease in BMI of 2.4 kg/m<sup>2</sup> after 6 months. This effect was statistically significant, but patients receiving sibutramine had greater increase in blood pressure and pulse rate than placebo-treated patients. **Orlistat** was associated with a significant fall in BMI of 0.7 kg/m<sup>2</sup>, but treatment was associated with increased rates of gastrointestinal side effects including abdominal discomfort, pain, and steatorrhea. Side effects are usually mild to moderate and generally decrease in frequency with continued treatment; this decrease may result from patients learning to consume less dietary fat to avoid these side effects. Orlistat must be taken with each meal, thus reducing its utility in children who often are in school during lunchtime.

### Additional medications used but not FDA-approved for the treatment of obesity

**Metformin** decreased BMI slightly but significantly in each of the three studies analyzed, but the overall effect did not reach statistical significance in the meta-analysis (118). This outcome may, in part, reflect differences in study design, because one of the studies (201) did not include dietary restrictions. Metformin may be useful in combating the weight gain observed in children taking atypical psychotropic medications, *e.g.* clozapine, olanzapine, risperidone, quetiapine, aripiprazole, and valproate (209). However, cessation of metformin therapy may lead to a rebound hyperinsulinemia and rapid weight gain, whether or not the offending psychotropic medication is continued. Although not approved by the FDA for this indication, metformin has been successfully used to treat PCOS with and without concomitant obesity and insulin insensitivity (210, 211). Metformin is approved for the treatment of T2DM in children at least 10 yr of age.

Although not FDA-approved for the treatment of obesity, the FDA-approved product labeling for GH presents data indicating that GH treatment of children with Prader-Willi syndrome decreases body fat percentage and increases lean body mass (212). GH seemed to be of particular benefit when started before 18 months of age (213). A summary of the benefits and risks of GH treatment of Prader-Willi syndrome was published in 2008 (208). Despite these encouraging preliminary results in Prader-Willi syndrome, a review of the effects of GH treatment in adult obesity failed to reveal any consistent beneficial effects and described the difficulties in assessing body composition (214).

**Octreotide** acts on the voltage-gated calcium channel of the  $\beta$ -cell coupled to the somatostatin receptor (215, 216) and through G<sub>o</sub> inhibition limits the opening of this calcium channel, decreasing the magnitude of insulin response to glucose (217). An examination of BMI responses to octreotide in a multivariate analysis in children with hypothalamic obesity demonstrated that insulin hypersecretion with concomitant retention of insulin sensitivity before therapy predicted success (99). In hyperinsulin-secreting obese adults, treatment with octreotide long-acting repeatable for 6 months resulted in significant weight loss as compared with controls. Greater weight loss correlated with a greater degree of insulin hypersecretion (218).

Mutations of the leptin gene in humans recapitulate the phenotype of the ob/ob leptin-deficient mouse (219). Few such patients (no more than 10 as of 2008) have been described. These patients manifest hyperphagia from birth, with obesity documentable as early as 6 months of age. The excess insulin, due to vagal overactivity and IR, may cross-react with the IGF-I receptor to increase height velocity and bone age. Serum leptin is undetectable. The diagnosis is made by unmeasurable serum leptin levels. Leptin therapy in these patients results in extraordinary loss of weight and fat mass (205, 220), along with reduction in hyperphagia, resolution of obesity, induction of puberty, and improvement in T cell responsiveness (206).

**Topiramate** is a novel anticonvulsant used in children and adults that blocks voltage-dependent sodium channels, enhances the activity of the GABA<sub>A</sub> receptor, and antagonizes a glutamate receptor other than the N-methyl-D-aspartate receptor. Topira-

**TABLE 2.** Medications proposed for the treatment of obesity<sup>a</sup>

| Drug                                                                                                                      | Dosage                                | Side effects                                                                                                                                                                              | Monitoring and contraindications                                                                                                                                                                                                 |
|---------------------------------------------------------------------------------------------------------------------------|---------------------------------------|-------------------------------------------------------------------------------------------------------------------------------------------------------------------------------------------|----------------------------------------------------------------------------------------------------------------------------------------------------------------------------------------------------------------------------------|
| Sibutramine (98, 197, 198), not FDA-approved for <16 yr of age                                                            | 5–15 mg PO daily                      | Tachycardia, hypertension, palpitations, insomnia, anxiety, nervousness, depression, diaphoresis                                                                                          | Monitor HR, BP. Do not use with other drugs, MAO inhibitors.                                                                                                                                                                     |
| Orlistat (98, 199, 200), not FDA-approved for <12 yr of age                                                               | 120 mg PO tid                         | Borborygmi, flatus, abdominal cramps, fecal incontinence, oily spotting, vitamin malabsorption                                                                                            | Monitor 25OHD <sub>3</sub> levels. MVI supplementation is strongly recommended. A lower dose preparation has been approved for over-the-counter sale.                                                                            |
| Metformin, <sup>b</sup> not FDA-approved for treatment of obesity; approved for ≥10 yr of age for T2DM (98, 99, 201, 202) | 250–1000 mg PO bid                    | Nausea, flatulence, bloating, diarrhea; usually resolves. Lactic acidosis not yet reported in children.                                                                                   | Do not use in renal failure or with iv contrast. MVI supplementation is strongly recommended.                                                                                                                                    |
| Octreotide, <sup>b</sup> not FDA-approved for treatment of obesity (99, 203, 204)                                         | 5–15 μg/kg/d sc divided tid           | Cholelithiasis (can be prevented by concurrent ursodiol), diarrhea, edema, abdominal cramps, nausea, bloating, reduction in T <sub>4</sub> concentrations, decreased GH but normal IGF-I. | Monitor fasting glucose, FT <sub>4</sub> , HbA <sub>1c</sub> . Useful only for hypothalamic obesity. Ursodiol coadministration is strongly recommended.                                                                          |
| Leptin, <sup>b</sup> not approved by FDA (205, 206)                                                                       | Titration of dose to serum levels, sc | Local reactions                                                                                                                                                                           | Useful <i>only</i> in leptin deficiency.                                                                                                                                                                                         |
| Topiramate, <sup>b</sup> not FDA-approved for treatment of obesity (207); data in adults only                             | 96–256 mg/d PO                        | Paresthesias, difficulty with concentration/attention, depression, difficulty with memory, language problems, nervousness, psychomotor slowing                                            | No pediatric data.                                                                                                                                                                                                               |
| GH, <sup>b</sup> not FDA-approved for treatment of obesity (208)                                                          | 1–3 mg/m <sup>2</sup> sc daily        | Edema, carpal tunnel syndrome, death in patients with preexisting obstructive sleep apnea                                                                                                 | <b>FDA-approved only in Prader-Willi syndrome</b> to increase height velocity. It should be used only after screening to rule out obstructive sleep apnea. Must closely monitor pulmonary function, glucose, HbA <sub>1c</sub> . |

MVI, Multivitamins; PO, by mouth; tid, three times daily; bid, twice daily; HR, heart rate; BP, blood pressure, MAO, monoamine oxidase; 25OHD<sub>3</sub>, 25-hydroxyvitamin D<sub>3</sub>; FT<sub>4</sub>, free T<sub>4</sub>; HbA<sub>1c</sub>, glycosylated hemoglobin.

<sup>a</sup> Pharmacotherapy is not usually considered if the BMI is below the 95th percentile, but there are additional factors to consider. If we initiate pharmacotherapy early in the course of obesity, we may prevent severe weight gain and metabolic complications, but we may treat an excess of children, raise the rate of unwarranted side effects, and increase the costs to individuals and to society. Alternatively, if we begin medication late in the course of obesity, we run the risk of runaway weight gain and long-term morbidity. One approach that reconciles these difficulties is to act aggressively with lifestyle intervention in overweight and mildly obese patients to prevent severe obesity and to consider pharmacotherapy when the risk of complications is high or soon after complications emerge. The tipping point for pharmacotherapy could be if the family history is strongly positive for a major comorbidity. **Lifestyle intervention should precede pharmacotherapy and should be maintained during pharmacotherapy.**

<sup>b</sup> The use of these non-FDA-approved agents should be restricted to large, well-controlled studies.

mate may induce insulin sensitivity in liver and muscle and directly in adipocytes (221). In a study of adults (207), almost 33% of the subjects dropped out because of adverse events (Table 2). Anorexia and weight loss occur early in 10 to 40% of children treated with topiramate for seizures, an effect that in some cases has led to discontinuing the medication (222). There are no studies of topiramate in childhood obesity. **Its use as an antiobesity agent should be limited because it promotes drowsiness and interferes with cognition, and it should not be used outside of a clinical research study.**

Table 2 summarizes the dosage, efficacy, adverse effects, contraindications, and monitoring needs of some of the medications used for the treatment of obesity.

### 3.2 Values and preferences

The suggestion to limit use of pharmacotherapy in children and adolescents reflects our preference for managing pediatric obesity as a serious lifestyle condition with important lifelong consequences and our placing a lower value on achieving short-term success, a higher value on avoiding drug side effects and costs that accumulate over time, and a higher value on achieving healthy weight through the incorporation of healthy behaviors.

### 3.2 Remarks

The assessment of drug efficacy presented here is founded only on the ability of medications to reduce BMI or BMI z-score. It must be emphasized that “antiobesity” drugs may have dif-



ferential effects on BMI and obesity-associated comorbidities (98). For example, certain medications (e.g. sibutramine, orlistat) may be more effective for weight loss than for treatment of impaired glucose tolerance, whereas other medications (e.g. metformin) have more potent effects on insulin production and glucose tolerance than on body weight *per se*. Drug selection should be tailored to the individual patient, with strong attention paid to the family history. The primary objective is to prevent comorbidities in the obese (BMI  $\geq$  95th percentile) patient. Most importantly, the benefits of any drug used to treat childhood obesity should clearly outweigh its risks.

**In general, children with a BMI below the 95th percentile should not be treated with antiobesity drugs.** Pharmacotherapy for overweight children (BMI  $\geq$  85th but  $<$ 95th percentile) should be reserved for those with **significant, severe** comorbidities who have not responded to lifestyle modification. Although, as mentioned in 2.2 *Remarks*, data suggest that adult Asians (and Native Americans) develop obesity-associated comorbidities at a lower BMI than do Europeans (68, 69), similar data are not available for children and adolescents, and so we cannot recommend the use of pharmacotherapy at a BMI range differing from the above recommendations.

The use of pharmacotherapeutic agents not yet approved for the treatment of pediatric obesity should be restricted to participation in large, well-controlled clinical studies.

### 3.3 Bariatric surgery recommendations

3.3.a *We suggest that bariatric surgery be considered only under the following conditions:*

1. *The child has attained Tanner 4 or 5 pubertal development and final or near-final adult height.*
2. *The child has a BMI  $>$  50 kg/m<sup>2</sup> or has BMI above 40 kg/m<sup>2</sup> and significant, severe comorbidities.*
3. *Severe obesity and comorbidities persist despite a formal program of lifestyle modification, with or without a trial of pharmacotherapy.*
4. *Psychological evaluation confirms the stability and competence of the family unit.*
5. *There is access to an experienced surgeon in a medical center employing a team capable of long-term follow-up of the metabolic and psychosocial needs of the patient and family, and the institution is either participating in a study of the outcome of bariatric surgery or sharing data.*
6. *The patient demonstrates the ability to adhere to the principles of healthy dietary and activity habits (2 $\oplus\oplus\circ\circ$ ).*

3.3.b *We recommend against bariatric surgery for preadolescent children, for pregnant or breast-feeding adolescents, and for those planning to become pregnant within 2 yr of surgery; for any patient who has not mastered the principles of healthy dietary and activity habits; for any patient with an unresolved eating disorder, untreated psychiatric disorder, or Prader-Willi syndrome (1 $\oplus\oplus\circ\circ$ ).*

### 3.3 Evidence

Bariatric procedures for weight loss can be divided into **malabsorptive**, **restrictive**, and **combination** procedures. Purely malabsorptive procedures aim to decrease the functional length or

efficiency of the intestinal mucosa through anatomic rearrangement of the intestine. These procedures include the jejunoileal bypass and the biliopancreatic diversion with duodenal switch. Because of the high morbidity and mortality associated with these procedures, they cannot be recommended for use in children.

Laparoscopic adjustable gastric banding (LAGB) is a wholly restrictive procedure. It uses a prosthetic band to encircle and compartmentalize the proximal stomach into a small pouch and a large remnant (223). The Roux-en-Y gastric bypass (RYGB) is a combination procedure (223). It is a modification of gastric bypass and has become the most commonly performed bariatric surgical procedure. It involves dividing the stomach to create a small (15- to 30-ml) stomach pouch into which a segment of jejunum approximately 15 to 60 cm inferior to the ligament of Treitz is inserted, whereas the proximal portion of the jejunum that drains the bypassed lower stomach and duodenum is reanastomosed 75 to 150 cm inferior to the gastrojejunostomy (223). This procedure combines the restrictive nature of gastrectomy with the consequences of dumping physiology as a negative conditioning response when high-calorie liquid meals are ingested. Although the LAGB procedure is considered safer than RYGB, the FDA has not yet approved LAGB for use in adolescents.

Bariatric surgery is an effective weight loss treatment for adults with a BMI above 40 kg/m<sup>2</sup>, and there are sufficient data to calculate complication risks for adults (224). Similar data for adolescents are scarce. A health technology assessment for the Washington State Health Care Authority reviewed the data from 17 studies comprising 553 morbidly obese adolescent patients (225). A clinically significant weight loss was defined as a loss of 7% of body weight. This amount corresponded to a decrease in BMI of 4 U for patients undergoing RYGB (period of follow-up ranged from 1 to 6.3 yr) and a decrease of 3.5 U for patients undergoing LAGB (period of follow-up ranged from 1.7 to 3.3 yr). The conclusions reached in this assessment, mostly based on weak evidence, were that 1) both procedures resulted in clinically significant weight loss; 2) LAGB resolved the comorbid conditions of diabetes and hypertension, whereas RYGB resolved hypertension (there were insufficient data to rate the resolution of other comorbidities); 3) the safety profile (moderate evidence) for LAGB after a follow-up period of 1 to 85 months revealed no operative or postoperative deaths; 26 of 328 patients required reoperation to correct complications (band slippage, intragastric migration, and port/tubing problems); 4) the safety profile (moderate evidence) for RYGB after a follow-up period of 2 wk to 6 yr revealed a combination of mild (slight malnutrition) and severe (pulmonary embolism, severe malnutrition, postoperative bleeding, and gastrointestinal obstruction) complications.

We agree with the expert panels (226, 227) that suggest bariatric surgery for adolescents with obesity-related comorbid conditions that threaten the adolescent's health—a BMI above 40 kg/m<sup>2</sup> and a severe comorbidity or a BMI above 50 kg/m<sup>2</sup> and less severe comorbidity. These cut-points are the ones generally accepted for adolescents. Others have suggested that we should consider using a BMI in at least the 99th percentile—equivalent to an adult BMI of 35–40 kg/m<sup>2</sup>—with severe comorbidities as

a cut-point (228). There are insufficient data concerning the complication rates using the current cut-points to warrant suggesting any changes (224, 225, 229).

Gastric pacing studies are being done in adults (230), but no studies in children have been published.

### 3.3 Values and preferences

Our suggestion for limited use of bariatric surgery places a relatively higher value on avoiding anatomical and functional changes in developing children, on avoiding unforeseen complications associated with lifelong exposure to these changes, and on avoiding the costs and perioperative complications of these procedures. It places a relatively lower value on the weight loss and amelioration of obesity-related complications associated with bariatric surgery.

### 3.3 Remarks

**Requirements for patients.** It must be clear to the patient and the family that bariatric surgery is an adjunct to a sincere commitment to alteration of lifestyle and behavior rather than a cure. All obese children must first demonstrate their ability to adhere to a family-based dietary and lifestyle modification program.

**Requirements for preoperative care.** Bariatric surgery in adolescents should be performed in regional pediatric academic centers with programs equipped to handle the data acquisition, long-term follow-up, and multidisciplinary issues of these difficult patients (226). A multidisciplinary team with medical (including endocrine, gastrointestinal, cardiovascular, pulmonary, and otolaryngological expertise), surgical, nutritional, and psychological expertise should carefully select adolescents who are well informed and motivated as potential candidates for bariatric surgery and should provide preoperative care and counseling. Patients and families must be well informed as to the risks and complications of bariatric surgery.

**Requirements for postoperative care.** Postoperative attention to the principles of growth, development, and compliance is essential to avoid adverse physical, cognitive, and psychosocial outcomes after bariatric surgery (226). Adolescents undergoing bariatric surgery require lifelong medical and nutritional surveillance postoperatively (231), especially to ensure adequate vitamin and mineral intake, as well as extensive counseling. Patients lacking such help tend to regain their weight over time (232).

Finally, more data are required to assess the effects of and complications from bariatric surgery in adolescents, and clinicians are encouraged to enroll their patients into a national database. The National Institutes of Health has funded a multicenter study of bariatric surgery in adolescents (<http://clinicaltrials.gov/ct2/show/NCT00474318>). Criteria for patient enrollment include adolescents who have reached physical and psychological maturity, whose BMI is at least 40 kg/m<sup>2</sup> with significant obesity-related comorbidity, and who were unable to lose weight after 6 months of supervised participation in two separate behavioral or medical weight loss programs.

## 4.0 Prevention of obesity recommendations

### 4.1 Recommendations for preventing obesity

4.1.a *We recommend breast-feeding for a minimum of 6 months (1⊕⊕⊕⊕).*

4.1.b *We suggest that clinicians promote and participate in efforts to educate children and parents by means of ongoing anticipatory guidance about healthy dietary and activity habits and, further, that clinicians encourage school systems to provide adequate health education courses promoting healthy eating habits (2⊕⊕⊕⊕).*

4.1.c *We suggest that clinicians promote and participate in efforts to educate the community about healthy dietary and activity habits (2⊕⊕⊕⊕).*

### 4.1 Evidence

The prime objective should be to prevent obesity before it happens, because once it develops, treatment is difficult (233–235). A meta-analysis commissioned by the Task Force (236) of randomized trials of lifestyle interventions to prevent pediatric obesity found significant but modest effects of these interventions on increasing physical activity ( $P = 0.004$ ), decreasing sedentary behavior ( $P < 0.00001$ ) with a significantly greater effect when directed toward children in contrast to adolescents ( $P = 0.02$ ), and reducing unhealthy dietary habits ( $P < 0.00001$ ). These beneficial effects did not translate into important changes in BMI (236). But, as discussed under *3.1.0 Remarks*, weight maintenance in a growing child may be as effective as weight loss in an adult.

Breast-feeding in infancy is associated with a decreased incidence of overweight and obesity in childhood (237–241). Infants exclusively breast-fed for 3 to 5 months are 35% less likely to be obese when they enter school (242). A study of sibling pairs supports this finding (243). A meta-analysis demonstrated an inverse relationship between the duration of breast-feeding and the risk of becoming overweight with a plateau after 9 months of breast-feeding. The odds ratio for becoming overweight declines to 0.81 after 3 months of breast-feeding, to 0.76 after 6 months, and to 0.67 after 9 months of breast-feeding, after which it plateaus (244).

A review of 39 published school-based intervention studies designed to prevent childhood obesity showed that 40% of the 33,852 participating children had a positive effect on weight control, and the remainder had a neutral effect. None of the studies showed a negative effect (245). Exercise can play an important role for adolescents in the context of prevention of young adult obesity (246).

For most children and families, lifestyle patterns related to eating and exercise are established early, affecting children not only when they are young but also throughout life. To avoid the harmful health consequences of less-than-optimal lifestyle choices, it is incumbent upon health care providers to convey to their patients and their families healthy guidelines, explaining, in a culturally sensitive and language-appropriate manner, the caloric needs and essential nutrient requirements of young children, as well as the importance of physical activity. This is of particular importance when we consider the increased efficacy of

prevention trials when directed toward children rather than adolescents (236).

Although healthy infants can differ considerably from one another in their caloric intake, appetite is the most efficient way to determine what an infant needs. Most infants instinctively know how much food they need and will not undereat or overeat unless pressured (247). Babies should be fed when hungry but should not be forced to finish all that they are served. Although low-fat and low-cholesterol diets are in vogue, they are not recommended for children under 2 yr of age.

#### 4.1 Values and preferences

In making these recommendations, the Task Force placed a relatively high value on promoting these lifestyle preventive activities with their potential wide-reaching benefits (beyond weight control) and potential safety.

#### 4.1 Remarks

Key players in the prevention and treatment of pediatric obesity are primary health care professionals (124, 233). Although anticipatory guidance is an important facet of pediatric care and it appears capable of having a salutatory effect on excessive weight gain (248), < half of the recommended guidance is received (249). In some studies only 19% of primary care physicians were aware of the AAP recommendations on obesity and only 3% complied with all of the recommendations (250). The situation was little better in an academic medical center where charts of obese children documented the obesity only 53% of the time (251). Whereas a diet was prescribed for 71% of the obese children, increased physical activity was prescribed 33% of the time and reduced television time only 5% of the time; the recommended laboratory tests were obtained only 13% of the time. Although obesity was recognized in 76% of the obese adolescents, it was recognized only 31% of the time in preschoolers (251). This latter finding was particularly disappointing because prevention of overweight and obesity should be undertaken while the condition is still mild and more readily treated by weight maintenance rather than weight loss. If a toddler or child is crossing BMI percentiles upwards (or weight-for-height percentiles), the primary care provider should begin to intervene by recommending reduced-fat milk and by restricting the intake of calorie-containing beverages such as juice as an initial step. If progress is not seen, then additional steps need to be undertaken (234, 235).

### 5.0 Societal barriers to implementation

#### 5.1 Recommendation

*We suggest that clinicians advocate for regulatory policies designed to decrease the exposure of children and adolescents to the promotion of unhealthy food choices in the community (e.g. by media advertisements targeting children and adolescents) (2⊕○○○).*

#### 5.1 Evidence

Through advertising, especially on television, the food industry exerts an enormous influence on children that can negate the

influence of parents and teachers. Although television can provide valuable educational programs, its advertisements for sweetened drinks, fast food restaurants, and high-calorie snacks can instill poor eating and leisure-time habits in children. In 2002 the food industry spent \$10 to \$12 billion on advertising directed toward children (Ref. 124, pp 153–192). In a survey of television programs aimed at children aged 2–11 and 12–17 yr, investigators found that 97.8 and 89.4%, respectively, of the advertisements were for food products consisting predominantly of nutrient-poor, high-sugar ingredients (252). A 30-sec ad can affect a child's food choices (253). A 2006 Institute of Medicine report cited these negative factors as influencing children and adolescents to adopt unhealthy lifestyle choices (254).

#### 5.2 Recommendation

*We suggest that clinicians advocate that school districts ensure that only nutritionally sound food and drinks are available to children in the school environment, including the school cafeteria and alternative sources of food such as vending machines (2⊕○○○).*

#### 5.2 Evidence

The average child who participates in the school lunch program consumes one third of the daily recommended caloric intake in school and three fifths if breakfast is also taken in school (Ref. 124, pp 237–284). Of the 58 million schoolchildren in this country, about 28 million take part in the lunch program and 8 million in the breakfast program. Although federal standards require that these meals meet certain nutritional standards, the total fat composition of lunches exceeded the federal nutrition target of no more than 30% of total calories (Ref. 124, pp 237–284). As children move through the school system, fewer students participate in the school lunch program, and they consume a nutritionally poorer lunch obtained through alternative food sources.

The problem largely lies in the availability of alternative food sources (termed “competitive foods”) in the school via snack bars, vending machines, or school-sponsored fund-raising sales. School districts have been tackling the issue by banning the sale of nutritionally poor food in their cafeterias, snack bars, and vending machines at school-sponsored events. These efforts have met resistance on the part of children, their parents (255), and school administrators who feared the loss of an important revenue source if children were to diminish their purchases of “competitive foods.” But in a 5-month post-ban study, schools did not suffer any loss in revenues from changed food and beverage sales (256). In several community studies, the fat content of meals decreased for those students exposed to a ban on junk food sales (Ref. 124, pp 237–284).

#### 5.3 Recommendation

*We suggest that clinicians advocate parental participation in the design of school-based dietary or physical activity programs and that schools educate parents about the rationale for these programs to ensure their understanding and cooperation (2⊕○○○).*

### 5.3 Evidence

Even if schools institute health promotion programs and restrict the availability of unhealthy foods on site, these efforts may be contravened by cultural concepts and parental actions. Children may not be receptive to new, albeit healthy, foods, and persistence is required on the part of school authorities and parents (255). Adults, as well as children, may resist efforts to restrict unhealthy foods in schools. For example, when pastries and candies for at-school celebrations and birthdays were banned in one Texas school district, parents objected, and the Texas state legislature passed a measure prohibiting such a ban (257).

It is important that parents, as the primary caretakers, be educated about proper nutrition because the likelihood of the family's consuming the recommended amount of fruits and vegetables increases not only with family income and general educational level, but also with the amount of nutrition education received (258).

### 5.4 Recommendation

*We suggest that clinicians advocate that community master planners design, redesign, and organize communities to maximize opportunities for safe walking or cycling to school, recreational activity and athletic events, and neighborhood shopping as means to encourage greater physical activity (2⊕○○○).*

### 5.4 Evidence

The physical and social organization of communities plays a role in the prevention and treatment of childhood obesity. Today, only 25% of children walk or bike to school as compared with 48% in 1969 (Ref. 124, pp 193–221).

Communities need to “provide places where children can play outside, particularly within their residential neighborhoods, and where they can safely walk, bike, or travel by other self-propelled means to destinations such as the park, playground, or school” (Ref. 124, pp 193–221). Some communities are now tackling this task as they adopt street layouts that suppress vehicular speed.

Parental concern about neighborhood crime and, therefore, their children's safety may cause children to remain at home after school and to engage in sedentary rather than physical activities. Although the data on this particular correlation are inconsistent (Ref. 124, pp 193–221), studies show a correlation between parents' perceptions of neighborhood safety and childhood obesity (259, 260).

Some localities have made an effort to promote the “Safe Routes to School” (SR25) initiative to increase the percentage of students walking or riding bicycles to school. Comprehensive SR25 programs have been successful where tried (261, 262).

### 5.5 Recommendation

*We suggest that clinicians advocate that policymakers provide incentives to ensure that retailers can offer affordable, high-quality fresh fruits and vegetables to all (2⊕○○○).*

### 5.5 Evidence

For the poor, food expense represents an important item in a family's budget (Ref. 124, pp 193–221). At least one study showed that a diet rich in fresh fruits, vegetables, whole grains,

and protein costs more than a diet based on refined grains, added sugars, and fats (263). But a diet richer in fruits and vegetables can reduce caloric intake and lead to weight control (264). There are fewer conveniently located supermarkets in poorer neighborhoods but many “convenience stores” selling calorie-dense foods. Urban stores tend to stock fewer of the healthier foods and have less of a variety of foods (265). Even if supermarket availability were to improve, prices are still lower in the poorer neighborhoods for the higher fat, calorie-dense foods (266). Some policies (including the federal government farm subsidy program) have encouraged production of high-fructose corn syrup and other commodities used extensively in processed foods (267). Even when restaurants advertise and make healthy food items available, consumer habits may continue to prefer burgers, fries, and other high-calorie, high-fat items (268, 269).

## SUMMARY OF RECOMMENDATIONS

### 1.0 The problem with obesity

The objective of interventions in overweight and obese children and adolescents is the prevention or amelioration of obesity-related comorbidities, e.g. glucose intolerance and T2DM, metabolic syndrome, dyslipidemia, and hypertension.

### 2.0 Diagnosis of overweight and obesity

2.1 We recommend the use of the BMI (calculated as weight in kilograms divided by height in meters squared), with CDC-derived normative percentiles, as the preferred method for the diagnosis of the overweight or obese child (48) (1⊕⊕○○).

2.2 We recommend that a child be diagnosed as overweight if the BMI is in at least the 85th percentile but < the 95th percentile for age and sex, and as obese if the BMI is in at least the 95th percentile for age and sex (1⊕○○○).

2.3 We recommend against a routine laboratory evaluation for endocrine causes of obesity in obese children or early to mid-pubertal obese adolescents unless the child's height velocity, assessed in relation to stage of puberty and family background, is attenuated (1⊕⊕○○).

2.4.a We recommend referral to a geneticist for children whose obesity has a syndromic etiology, especially in the presence of neurodevelopmental abnormalities (1⊕○○○).

2.4.b We suggest that parents of children who have inexorably gained weight from early infancy and have risen above the 97th percentile for weight by 3 yr of age be informed of the availability of MC4R genetic testing. However, the test is positive in only 2–4% of such patients who are above the 97th percentile for weight (71) and currently will not alter treatment (2⊕○○○).

2.5 We recommend that children with a BMI in at least the 85th percentile be evaluated for associated comorbidities and complications (see Table 1 and Fig. 1) (1⊕○○○).

### 3.0 Treatment of obesity

#### 3.1 Lifestyle recommendations

3.1.0 We recommend that clinicians prescribe and support intensive lifestyle (dietary, physical activity, and behavioral)



modification for the entire family and the patient in an age-appropriate manner and as the prerequisite for all overweight and obesity treatments for children and adolescents (1⊕○○○).

### 3.1.1 Dietary recommendations

3.1.1.a We recommend that clinicians prescribe and support healthy eating habits such as:

- Avoiding the consumption of calorie-dense, nutrient-poor foods (e.g. sweetened beverages, sports drinks, fruit drinks and juices, most “fast food,” and calorie-dense snacks) (1⊕⊕○○).

3.1.1.b We suggest that clinicians prescribe and support:

- Controlling caloric intake through portion control in accordance with the Guidelines of the American Academy of Pediatrics [http://pediatrics.aappublications.org/cgi/reprint/117/2/544] (2⊕○○○).
- Reducing saturated dietary fat intake for children older than 2 yr of age (2⊕⊕○○).
- Increasing the intake of dietary fiber, fruits, and vegetables (2⊕○○○).
- Eating timely, regular meals, particularly breakfast, and avoiding constant “grazing” during the day, especially after school (2⊕○○○).

### 3.1.2 Physical activity recommendations

3.1.2.1 We recommend that clinicians prescribe and support 60 min of daily moderate to vigorous physical activity (1⊕⊕○○).

3.1.2.2 We suggest that clinicians prescribe and support a decrease in time spent in sedentary activities, such as watching television, playing video games, or using computers for recreation. Screen time should be limited to 1–2 h per day, according to the American Academy of Pediatrics (182) (2⊕○○○).

### 3.1.3 Psychosocial recommendations

3.1.3.a We suggest that clinicians educate parents about the need for healthy rearing patterns related to diet and activity. Examples include parental modeling of healthy habits, avoidance of overly strict dieting, setting limits of acceptable behaviors, and avoidance of using food as a reward or punishment (2⊕○○○).

3.1.3.b We suggest that clinicians probe for and diagnose unhealthy intrafamily communication patterns and support rearing patterns that seek to enhance the child’s self-esteem (2⊕○○○).

### 3.2 Pharmacotherapy recommendations

3.2.a We suggest that pharmacotherapy (in combination with lifestyle modification) be considered if a formal program of intensive lifestyle modification has failed to limit weight gain or to mollify comorbidities in obese children. Overweight children should not be treated with pharmacotherapeutic agents unless significant, severe comorbidities persist despite intensive lifestyle modification. In these children, a strong family history of T2DM or cardiovascular risk factors strengthens the case for pharmacotherapy (2⊕○○○).

3.2.b We suggest that pharmacotherapy be offered only by clinicians who are experienced in the use of antiobesity agents and are aware of the potential for adverse reactions (2⊕○○○).

### 3.3 Bariatric surgery recommendations

3.3.a We suggest that bariatric surgery be considered only under the following conditions:

1. The child has attained Tanner 4 or 5 pubertal development and final or near-final adult height.
2. The child has a BMI > 50 kg/m<sup>2</sup> or has BMI above 40 kg/m<sup>2</sup> and significant, severe comorbidities.
3. Severe obesity and comorbidities persist despite a formal program of lifestyle modification, with or without a trial of pharmacotherapy.
4. Psychological evaluation confirms the stability and competence of the family unit.
5. There is access to an experienced surgeon in a medical center employing a team capable of long-term follow-up of the metabolic and psychosocial needs of the patient and family, *and the institution is either participating in a study of the outcome of bariatric surgery or sharing data.*
6. The patient demonstrates the ability to adhere to the principles of healthy dietary and activity habits (2⊕⊕○○).

3.3.b We recommend against bariatric surgery for preadolescent children, for pregnant or breast-feeding adolescents, and for those planning to become pregnant within 2 yr of surgery; for any patient who has not mastered the principles of healthy dietary and activity habits; for any patient with an unresolved eating disorder, untreated psychiatric disorder, or Prader-Willi syndrome (1⊕⊕○○).

### 4.0 Prevention of obesity recommendations

4.1.a We recommend breast-feeding for a minimum of 6 months (1⊕⊕○○).

4.1.b We suggest that clinicians promote and participate in efforts to educate children and parents by means of ongoing anticipatory guidance about healthy dietary and activity habits and, further, that clinicians encourage school systems to provide adequate health education courses promoting healthy eating habits (2⊕⊕○○).

4.1.c We suggest that clinicians promote and participate in efforts to educate the community about healthy dietary and activity habits (2⊕○○○).

### 5.0 Societal barriers to implementation

We suggest that clinicians advocate:

5.1 For regulatory policies designed to decrease the exposure of children and adolescents to the promotion of unhealthy food choices in the community (e.g. by media advertisements targeting children and adolescents) (2⊕○○○).

5.2 That school districts ensure that only nutritionally sound food and drinks are available to children in the school environment, including the school cafeteria and alternative sources of food such as vending machines (2⊕○○○).

5.3 For parental participation in the design of school-based dietary or physical activity programs and that schools educate

parents about the rationale for these programs to ensure their understanding and cooperation (2⊕○○○).

5.4 That community master planners design, redesign, and organize communities to maximize opportunities for safe walking or cycling to school, recreational activity and athletic events, and neighborhood shopping as a means to encourage greater physical activity (2⊕○○○).

5.5 That clinicians advocate that policymakers provide incentives to ensure that retailers can offer affordable, high-quality fresh fruits and vegetables to all (2⊕○○○).

## Acknowledgments

The members of the Task Force thank Dr. Robert Vigersky and the Clinical Guidelines Subcommittee, the Clinical Affairs Core Committee, the Executive Committee of The Endocrine Society, and the Obesity Task Force of the Lawson Wilkins Pediatric Endocrine Society for review of the earlier versions of this guideline and for their suggestions, which were incorporated into the final document. We also thank the members of The Endocrine Society and the Lawson Wilkins Pediatric Endocrine Society who contributed additional comments. We particularly thank Dr. Patricia A. Stephens, the medical writer for this guideline, for checking the references and formatting the manuscript. We also thank the support staff of The Endocrine Society, without whose assistance this guideline could not have been produced.

Address all correspondence and requests for reprints to: The Endocrine Society, 8401 Connecticut Avenue, Suite 900, Chevy Chase, Maryland 20815. E-mail: govt-prof@endo.society.org. Telephone: 301-941-0200. Address all reprint requests for orders of 101 and more to: Menna Burgess, Reprint Sales Specialist, Cadmus Professional Communications. Telephone: 410-819-3960, fax: 410-684-2789, or e-mail: reprints2@cadmus.com. Address all reprint requests for orders of 100 or less to Society Services. Telephone: 301-941-0210, or e-mail: societyservices@endo-society.org.

## Financial Disclosure of Task Force

**Gilbert P. August, M.D.** (chair) – Significant Financial Interests: none declared; Governance: none declared; Consultation or Advisement: none declared; Grant or Other Research Support: none declared. **Sonia Caprio, M.D.** – Significant Financial Interests: none declared; Governance: none declared; Consultation or Advisement: none declared; Grant or Other Research Support: none declared. **Ilene Fennoy, M.D., MPH** – Significant Financial Interests: none declared; Governance: none declared; Consultation or Advisement: Novo Nordisk Turner's Syndrome Advisory Committee (2005); Grant or Other Research Support: Novo Nordisk Answer Program, Serono – Cod Click Adolescent Transition Study, Unimed – Androgel in Male Hypogonadal Puberty Study. **Michael Freemark, M.D.** – Significant Financial Interests: none declared; Governance: none declared; Consultation or Advisement: none declared; Grant or Other Research Support: none declared. **Francine R. Kaufman, M.D.** – Significant Financial Interests: none declared; Governance: none declared; Consultation or Advisement: Medtronic, Lifescan, Omnipod, Mannkind, Novo Nordisk; Grant or Other Research Support: GSK, Medtronic. **Robert H. Lustig, M.D.** – Significant Financial Interests: none declared; Governance: none declared; Consultation or Advisement: Novo Nordisk Pharmaceuticals; Grant or Other Research Support: EndoVx, Inc., Novartis Pharmaceuticals Corp. **Janet H. Silverstein, M.D.** – Significant Financial Interests: none declared; Governance: none declared; Consultation or Advisement: Advisory board member for the Genentech Center for Clinical Research in Endocrinology; Grant or Other Research Support: none declared. **Phyllis W. Speiser, M.D.** – Significant Financial Interests: none declared; Governance: none declared; Consultation or Advisement: none declared; Grant or Other Research Support: Speakers Bureau – Lilly, Pfizer, and Investigator – Lilly, Genentech, Novo Nordisk, Pfizer, Serono. **Dennis M. Styne, M.D.** – Significant Financial Interests: none declared; Governance: none declared; Consultation or Advisement: Healthy Living Academy; Grant or Other Research Support: none declared. **\*Victor M. Montori, M.D.** – Financial or Business/Organizational Interests: none declared; Significant Financial or Leadership Position: none declared; Consultation/Advisement: KER Unit (Mayo Clinic).

**Cosponsoring Association:** Lawson Wilkins Pediatric Endocrine Society.

## Disclaimer

Clinical Practice Guidelines are developed to be of assistance to endocrinologists by providing guidance and recommendations for particular areas of practice. The Guidelines should not be considered inclusive of all proper approaches or methods, or exclusive of others. The Guidelines cannot guarantee any specific outcome, nor do they establish a standard of care. The Guidelines are not intended to dictate the treatment of a particular patient. Treatment decisions must be made based on the independent judgment of health care providers and each patient's individual circumstances.

The Endocrine Society makes no warranty, express or implied, regarding the Guidelines and specifically excludes any warranties of merchantability and fitness for a particular use or purpose. The Society shall not be liable for direct, indirect, special, incidental, or consequential damages related to the use of the information contained herein.

\*Evidence-based reviews for this guideline were prepared under contract with The Endocrine Society.

## References

1. Atkins D, Best D, Briss PA, Eccles M, Falck-Ytter Y, Flottorp S, Guyatt GH, Harbour RT, Haugh MC, Henry D, Hill S, Jaeschke R, Leng G, Liberati A, Magrini N, Mason J, Middleton P, Mrukowicz J, O'Connell D, Oxman AD, Phillips B, Schunemann HJ, Edejer TT, Varonen H, Vist GE, Williams Jr JW, Zaza S 2004 Grading quality of evidence and strength of recommendations. *BMJ* 328:1490
2. Swiglo BA, Murad MH, Schunemann HJ, Kunz R, Vigersky RA, Guyatt GH, Montori VM 2008 A case for clarity, consistency, and helpfulness: state-of-the-art clinical practice guidelines in endocrinology using the grading of recommendations, assessment, development, and evaluation system. *J Clin Endocrinol Metab* 93:666–673
3. Guyatt G, Gutterman D, Baumann MH, Addrizzo-Harris D, Hylek EM, Phillips B, Raskob G, Lewis SZ, Schunemann H 2006 Grading strength of rec-

- ommendations and quality of evidence in clinical guidelines: report from an American College of Chest Physicians task force. *Chest* 129:174–181
4. Snow V, Barry P, Fitterman N, Qaseem A, Weiss K 2005 Pharmacologic and surgical management of obesity in primary care: a clinical practice guideline from the American College of Physicians. *Ann Intern Med* 142:525–531
  5. NCHS 2005 Prevalence of overweight among children and adolescents: United States, 1999–2002. National Center for Health Statistics. Available at: <http://www.cdc.gov/nchs/products/pubs/pubd/hestats/overwght99.htm>
  6. Hedley AA, Ogden CL, Johnson CL, Carroll MD, Curtin LR, Flegal KM 2004 Prevalence of overweight and obesity among US children, adolescents, and adults, 1999–2002. *JAMA* 291:2847–2850
  7. Ogden CL, Carroll MD, Curtin LR, McDowell MA, Tabak CJ, Flegal KM 2006 Prevalence of overweight and obesity in the United States, 1999–2004. *JAMA* 295:1549–1555
  8. Barlow SE 2007 Expert committee recommendations regarding the prevention, assessment, and treatment of child and adolescent overweight and obesity: summary report. *Pediatrics* 120(Suppl 4):S164–92.
  9. Whitaker RC, Wright JA, Pepe MS, Seidel KD, Dietz WH 1997 Predicting obesity in young adulthood from childhood and parental obesity. *N Engl J Med* 337:869–873
  10. Bray GA 2002 Predicting obesity in adults from childhood and adolescent weight. *Am J Clin Nutr* 76:497–498
  11. Guo SS, Wu W, Chumlea WC, Roche AF 2002 Predicting overweight and obesity in adulthood from body mass index values in childhood and adolescence. *Am J Clin Nutr* 76:653–658
  12. Nader PR, O'Brien M, Houts R, Bradley R, Belsky J, Crosnoe R, Friedman S, Mei Z, Susman EJ 2006 Identifying risk for obesity in early childhood. *Pediatrics* 118:e594–601
  13. Berenson GS, Srinivasan SR, Bao W, Newman 3rd WP, Tracy RE, Wattigney WA 1998 Association between multiple cardiovascular risk factors and atherosclerosis in children and young adults. The Bogalusa Heart Study. *N Engl J Med* 338:1650–1656
  14. Wissler RW, Strong JP 1998 Risk factors and progression of atherosclerosis in youth. PDAY Research Group. Pathological Determinants of Atherosclerosis in Youth. *Am J Pathol* 153:1023–1033
  15. Freedman DS, Mei Z, Srinivasan SR, Berenson GS, Dietz WH 2007 Cardiovascular risk factors and excess adiposity among overweight children and adolescents: the Bogalusa Heart Study. *J Pediatr* 150:12–17.e2
  16. Baker JL, Olsen LW, Sorensen TI 2007 Childhood body-mass index and the risk of coronary heart disease in adulthood. *N Engl J Med* 357:2329–2337
  17. Sinha R, Fisch G, Teague B, Tamborlane WV, Banyas B, Allen K, Savoye M, Rieger V, Taksali S, Barbetta G, Sherwin RS, Caprio S 2002 Prevalence of impaired glucose tolerance among children and adolescents with marked obesity. *N Engl J Med* 346:802–810
  18. Liese AD, D'Agostino Jr RB, Hamman RF, Kilgo PD, Lawrence JM, Liu LL, Loots B, Linder B, Marcovina S, Rodriguez B, Standiford D, Williams DE 2006 The burden of diabetes mellitus among US youth: prevalence estimates from the SEARCH for Diabetes in Youth Study. *Pediatrics* 118:1510–1518
  19. Jago R, Harrell JS, McMurray RG, Edelstein S, El Ghormli L, Bassin S 2006 Prevalence of abnormal lipid and blood pressure values among an ethnically diverse population of eighth-grade adolescents and screening implications. *Pediatrics* 117:2065–2073
  20. Zimmet P, Alberti G, Kaufman F, Tajima N, Silink M, Arslanian S, Wong G, Bennett P, Shaw J, Caprio S 2007 The metabolic syndrome in children and adolescents. *Lancet* 369:2059–2061
  21. Chi CH, Wang Y, Wilson DM, Robinson TN 2006 Definition of metabolic syndrome in preadolescent girls. *J Pediatr* 148:788–792
  22. Grundy S 2006 Does the metabolic syndrome exist? *Diabetes Care* 29:1689–1692
  23. Cook S, Weitzman M, Auinger P, Nguyen M, Dietz WH 2003 Prevalence of a metabolic syndrome phenotype in adolescents: findings from the third National Health and Nutrition Examination Survey, 1988–1994. *Arch Pediatr Adolesc Med* 157:821–827
  24. Weiss R, Dziura J, Burgert TS, Tamborlane WV, Taksali SE, Yeckel CW, Allen K, Lopes M, Savoye M, Morrison J, Sherwin RS, Caprio S 2004 Obesity and the metabolic syndrome in children and adolescents. *N Engl J Med* 350:2362–2374
  25. Nguyen TT, Keil MF, Russell DL, Pathomvanich A, Uwaifo GI, Sebring NG, Reynolds JC, Yanovski JA 2001 Relation of acanthosis nigricans to hyperinsulinemia and insulin sensitivity in overweight African American and white children. *J Pediatr* 138:474–480
  26. Rasi A, Soltani-Arabshahi R, Shahbazi N 2007 Skin tag as a cutaneous marker for impaired carbohydrate metabolism: a case-control study. *Int J Dermatol* 46:1155–1159
  27. McCartney CR, Blank SK, Prendergast KA, Chhabra S, Eagleson CA, Helm KD, Yoo R, Chang J, Foster CM, Caprio S, Marshall JC 2007 Obesity and sex steroid changes across puberty: evidence for marked hyperandrogenemia in pre- and early pubertal obese girls. *J Clin Endocrinol Metab* 92:430–436
  28. Lurbe E, Alvarez V, Redon J 2001 Obesity, body fat distribution, and ambulatory blood pressure in children and adolescents. *J Clin Hypertens (Greenwich)* 3:362–367
  29. National High Blood Pressure Education Program Working Group on High Blood Pressure in Children and Adolescents 2004 The fourth report on the diagnosis, evaluation, and treatment of high blood pressure in children and adolescents. *Pediatrics* 114:555–576
  30. Falkner B, Gidding SS, Ramirez-Garnica G, Wiltrout SA, West D, Rappaport EB 2006 The relationship of body mass index and blood pressure in primary care pediatric patients. *J Pediatr* 148:195–200
  31. Sorof JM, Lai D, Turner J, Poffenbarger T, Portman RJ 2004 Overweight, ethnicity, and the prevalence of hypertension in school-aged children. *Pediatrics* 113:475–482
  32. Kambham N, Markowitz GS, Valeri AM, Lin J, D'Agati VD 2001 Obesity-related glomerulopathy: an emerging epidemic. *Kidney Int* 59:1498–1509
  33. Adelman RD, Restaino IG, Alon US, Blowey DL 2001 Proteinuria and focal segmental glomerulosclerosis in severely obese adolescents. *J Pediatr* 138:481–485
  34. Young T, Peppard PE, Gottlieb DJ 2002 Epidemiology of obstructive sleep apnea: a population health perspective. *Am J Respir Crit Care Med* 165:1217–1239
  35. Young T, Skatrud J, Peppard PE 2004 Risk factors for obstructive sleep apnea in adults. *JAMA* 291:2013–2016
  36. Schwimmer JB, Deutsch R, Kahen T, Lavine JE, Stanley C, Behling C 2006 Prevalence of fatty liver in children and adolescents. *Pediatrics* 118:1388–1393
  37. Alfire ME, Treem WR 2006 Nonalcoholic fatty liver disease. *Pediatr Ann* 35:290–294, 297–299
  38. Bray GA 2003 Risks of obesity. *Endocrinol Metab Clin North Am* 32:787–804, viii
  39. Kaechele V, Wabitsch M, Thiere D, Kessler AL, Haenle MM, Mayer H, Kratzer W 2006 Prevalence of gallbladder stone disease in obese children and adolescents: influence of the degree of obesity, sex, and pubertal development. *J Pediatr Gastroenterol Nutr* 42:66–70
  40. Boland LL, Folsom AR, Rosamond WD 2002 Hyperinsulinemia, dyslipidemia, and obesity as risk factors for hospitalized gallbladder disease. A prospective study. *Ann Epidemiol* 12:131–140
  41. Yanovski JA 2001 Pediatric obesity. *Rev Endocr Metab Disord* 2:371–383
  42. Sjoberg RL, Nilsson KW, Leppert J 2005 Obesity, shame, and depression in school-aged children: a population-based study. *Pediatrics* 116:e389–e392
  43. Kaplowitz PB, Slora EJ, Wasserman RC, Pedlow SE, Herman-Giddens ME 2001 Earlier onset of puberty in girls: relation to increased body mass index and race. *Pediatrics* 108:347–353
  44. Wang Y 2002 Is obesity associated with early sexual maturation? A comparison of the association in American boys versus girls. *Pediatrics* 110:903–910
  45. Jasik CB, Lustig RH 2008 Adolescent obesity and puberty: the “perfect storm”. *Ann NY Acad Sci* 1135:265–279
  46. Ibanez L, Dimartino-Nardi J, Potau N, Saenger P 2000 Premature adrenarche—normal variant or forerunner of adult disease? *Endocr Rev* 21:671–696
  47. Utriainen P, Jaaskelainen J, Romppanen J, Voutilainen R 2007 Childhood metabolic syndrome and its components in premature adrenarche. *J Clin Endocrinol Metab* 92:4282–4285
  48. NCHS 2004 2000 CDC growth charts: United States. National Center for Health Statistics. Available at: <http://www.cdc.gov/growthcharts/>
  49. Dietz WH, Bellizzi MC 1999 Introduction: the use of body mass index to assess obesity in children. *Am J Clin Nutr* 70:123S–125S
  50. Reilly JJ 2002 Assessment of childhood obesity: national reference data or international approach? *Obes Res* 10:838–840
  51. Schroeder DG, Martorell R 1999 Fatness and body mass index from birth to young adulthood in a rural Guatemalan population. *Am J Clin Nutr* 70:137S–144S
  52. Franklin MF 1999 Comparison of weight and height relations in boys from 4 countries. *Am J Clin Nutr* 70:157S–162S
  53. Wang Y, Adair L 2001 How does maturity adjustment influence the estimates of overweight prevalence in adolescents from different countries using an international reference? *Int J Obes Relat Metab Disord* 25:550–558
  54. Brambilla P, Bedogni G, Moreno LA, Goran MI, Gutin B, Fox KR, Peters DM, Barbeau P, De Simone M, Pietrobello A 2006 Crossvalidation of anthropometry against magnetic resonance imaging for the assessment of visceral and subcutaneous adipose tissue in children. *Int J Obes (Lond)* 30:23–30
  55. Kahn HS, Imperatore G, Cheng YJ 2005 A population-based comparison of



- BMI percentiles and waist-to-height ratio for identifying cardiovascular risk in youth. *J Pediatr* 146:482–488
56. Maffei C, Pietrobello A, Grezzani A, Provera S, Tato L 2001 Waist circumference and cardiovascular risk factors in prepubertal children. *Obes Res* 9:179–187
  57. Wang J 2006 Standardization of waist circumference reference data. *Am J Clin Nutr* 83:3–4
  58. Wang J, Thornton JC, Bari S, Williamson B, Gallagher D, Heymsfield SB, Horlick M, Kotler D, LaFerrere B, Mayer L, Pi-Sunyer FX, Pierson Jr RN 2003 Comparisons of waist circumferences measured at 4 sites. *Am J Clin Nutr* 77:379–384
  59. Hirschler V, Aranda C, Calcagno Mde L, Maccalini G, Jadzinsky M 2005 Can waist circumference identify children with the metabolic syndrome? *Arch Pediatr Adolesc Med* 159:740–744
  60. Lee S, Bacha F, Gungor N, Arslanian SA 2006 Waist circumference is an independent predictor of insulin resistance in black and white youths. *J Pediatr* 148:188–194
  61. Savva SC, Tornaritis M, Savva ME, Kourides Y, Panagi A, Siliotiou N, Georgiou C, Kafatos A 2000 Waist circumference and waist-to-height ratio are better predictors of cardiovascular disease risk factors in children than body mass index. *Int J Obes Relat Metab Disord* 24:1453–1458
  62. Katzmarzyk PT, Srinivasan SR, Chen W, Malina RM, Bouchard C, Berenson GS 2004 Body mass index, waist circumference, and clustering of cardiovascular disease risk factors in a biracial sample of children and adolescents. *Pediatrics* 114:e198–e205
  63. Fernandez JR, Redden DT, Pietrobello A, Allison DB 2004 Waist circumference percentiles in nationally representative samples of African-American, European-American, and Mexican-American children and adolescents. *J Pediatr* 145:439–444
  64. Flegal KM, Graubard BI, Williamson DF, Gail MH 2005 Excess deaths associated with underweight, overweight, and obesity. *JAMA* 293:1861–1867
  65. Reilly JJ 2005 Descriptive epidemiology and health consequences of childhood obesity. *Best Pract Res Clin Endocrinol Metab* 19:327–341
  66. Reilly JJ, Methven E, McDowell ZC, Hacking B, Alexander D, Stewart L, Kelnar CJ 2003 Health consequences of obesity. *Arch Dis Child* 88:748–752
  67. Whitlock EP, Williams SB, Gold R, Smith PR, Shipman SA 2005 Screening and interventions for childhood overweight: a summary of evidence for the US Preventive Services Task Force. *Pediatrics* 116:e125–e144
  68. Razak F, Anand SS, Shannon H, Vuksan V, Davis B, Jacobs R, Teo KK, McQueen M, Yusuf S 2007 Defining obesity cut points in a multiethnic population. *Circulation* 115:2111–2118
  69. Samaha FF 2007 New international measuring stick for defining obesity in non-Europeans. *Circulation* 115:2089–2090
  70. Zhu S, Heymsfield SB, Toyoshima H, Wang Z, Pietrobello A, Heshka S 2005 Race-ethnicity-specific waist circumference cutoffs for identifying cardiovascular disease risk factors. *Am J Clin Nutr* 81:409–415
  71. Reinehr T, Hinney A, de Sousa G, Austrup F, Hebebrand J, Andler W 2007 Definable somatic disorders in overweight children and adolescents. *J Pediatr* 150:618–622
  72. Geffner ME 1996 The growth without growth hormone syndrome. *Endocrinol Metab Clin North Am* 25:649–663
  73. Lazar L, Dan S, Phillip M 2003 Growth without growth hormone: growth pattern and final height of five patients with idiopathic combined pituitary hormone deficiency. *Clin Endocrinol (Oxf)* 59:82–88
  74. Lustig RH 2002 Hypothalamic obesity: the sixth cranial endocrinopathy. *Endocrinologist* 12:210–217
  75. Tanner JM, Davies PS 1985 Clinical longitudinal standards for height and height velocity for North American children. *J Pediatr* 107:317–329
  76. Rappold G, Blum WF, Shavrikova EP, Crowe BJ, Roeth R, Quigley CA, Ross JL, Niesler B 2007 Genotypes and phenotypes in children with short stature: clinical indicators of SHOX haploinsufficiency. *J Med Genet* 44:306–313
  77. An P, Freedman BI, Rich SS, Mandel SA, Arnett DK, Myers RH, Chen YD, Hunt SC, Rao DC 2006 Quantitative trait loci on chromosome 8q24 for pancreatic  $\beta$ -cell function and 7q11 for insulin sensitivity in obese nondiabetic white and black families: evidence from genome-wide linkage scans in the NHLBI Hypertension Genetic Epidemiology Network (HyperGEN) study. *Diabetes* 55:551–558
  78. Shmulewitz D, Heath SC, Blundell ML, Han Z, Sharma R, Salit J, Auerbach SB, Signorini S, Breslow JL, Stoffel M, Friedman JM 2006 Linkage analysis of quantitative traits for obesity, diabetes, hypertension, and dyslipidemia on the island of Kosrae, Federated States of Micronesia. *Proc Natl Acad Sci USA* 103:3502–3509
  79. Herbert A, Gerry NP, McQueen MB, Heid IM, Pfeuffer A, Illig T, Wichmann HE, Meitinger T, Hunter D, Hu FB, Colditz G, Hinney A, Hebebrand J, Koberwitz K, Zhu X, Cooper R, Ardlic K, Lyon H, Hirschhorn JN, Laird NM, Lenburg ME, Lange C, Christman MF 2006 A common genetic variant is associated with adult and childhood obesity. *Science* 312:279–283
  80. Hickman TB, Briefel RR, Carroll MD, Rifkind BM, Cleeman JI, Maurer KR, Johnson CL 1998 Distributions and trends of serum lipid levels among United States children and adolescents ages 4–19 years: data from the Third National Health and Nutrition Examination Survey. *Prev Med* 27:879–890
  81. Jolliffe CJ, Janssen I 2006 Distribution of lipoproteins by age and gender in adolescents. *Circulation* 114:1056–1062
  82. Cole TJ 2004 Children grow and horses race: is the adiposity rebound a critical period for later obesity? *BMC Pediatr* 4:6
  83. Whitaker RC, Pepe MS, Wright JA, Seidel KD, Dietz WH 1998 Early adiposity rebound and the risk of adult obesity. *Pediatrics* 101:E5
  84. Caulfield LE 2005 Methodological challenges in performing targeting: assessing dietary risk for WIC participation and education. *J Nutr* 135:879–881
  85. Krebs NF, Himes JH, Jacobson D, Nicklas TA, Guilday P, Styne D 2007 Assessment of child and adolescent overweight and obesity. *Pediatrics* 120(Suppl 4):S193–S228
  86. Matsumoto AM, Bremner WJ 2004 Serum testosterone assays—accuracy matters. *J Clin Endocrinol Metab* 89:520–524
  87. Miller KK, Rosner W, Lee H, Hier J, Sessimo G, Schoenfeld D, Neubauer G, Klibanski A 2004 Measurement of free testosterone in normal women and women with androgen deficiency: comparison of methods. *J Clin Endocrinol Metab* 89:525–533
  88. Rosenbloom AL, Joe JR, Young RS, Winter WE 1999 Emerging epidemic of type 2 diabetes in youth. *Diabetes Care* 22:345–354
  89. Silverstein JH, Rosenbloom AL 2001 Type 2 diabetes in children. *Curr Diab Rep* 1:19–27
  90. Lee JM, Okumura MJ, Davis MM, Herman WH, Gurney JG 2006 Prevalence and determinants of insulin resistance among U.S. adolescents: a population-based study. *Diabetes Care* 29:2427–2432
  91. Matthews DR, Hosker JP, Rudenski AS, Naylor BA, Treacher DF, Turner RC 1985 Homeostasis model assessment: insulin resistance and  $\beta$ -cell function from fasting plasma glucose and insulin concentrations in man. *Diabetologia* 28:412–419
  92. Gungor N, Saad R, Janosky J, Arslanian S 2004 Validation of surrogate estimates of insulin sensitivity and insulin secretion in children and adolescents. *J Pediatr* 144:47–55
  93. Yeckel CW, Weiss R, Dziura J, Taksali SE, Dufour S, Burgert TS, Tamborlane WV, Caprio S 2004 Validation of insulin sensitivity indices from oral glucose tolerance test parameters in obese children and adolescents. *J Clin Endocrinol Metab* 89:1096–1101
  94. Rodriguez-Moran M, Guerrero-Romero F 2006 Hyperinsulinemia in healthy children and adolescents with a positive family history for type 2 diabetes. *Pediatrics* 118:e1516–e1522
  95. Bell LM, Byrne S, Thompson A, Ratnam N, Blair E, Bulsara M, Jones TW, Davis EA 2007 Increasing body mass index z-score is continuously associated with complications of overweight in children, even in the healthy weight range. *J Clin Endocrinol Metab* 92:517–522
  96. Robbins DC, Andersen L, Bowsher R, Chance R, Dinesen B, Frank B, Gengerich R, Goldstein D, Widemeyer HM, Haffner S, Hales CN, Jarett L, Polonsky K, Porte D, Skyler J, Webb G, Gallagher K 1996 Report of the American Diabetes Association's Task Force on standardization of the insulin assay. *Diabetes* 45:242–256
  97. Ball GD, Huang TT, Gower BA, Cruz ML, Shaibi GQ, Weigensberg MJ, Goran MI 2006 Longitudinal changes in insulin sensitivity, insulin secretion, and  $\beta$ -cell function during puberty. *J Pediatr* 148:16–22
  98. Freemark M 2007 Pharmacotherapy of childhood obesity: an evidence-based, conceptual approach. *Diabetes Care* 30:395–402
  99. Lustig RH, Mietus-Snyder ML, Bacchetti P, Lazar AA, Velasquez-Mieyer PA, Christensen ML 2006 Insulin dynamics predict body mass index and z-score response to insulin suppression or sensitization pharmacotherapy in obese children. *J Pediatr* 148:23–29
  100. Weiss R 2006 Insulin sensitivity and secretion: swaying the pendulum. *J Pediatr* 148:3–4
  101. Klein S, Sheard NF, Pi-Sunyer X, Daly A, Wylie-Rosett J, Kulkarni K, Clark NG 2004 Weight management through lifestyle modification for the prevention and management of type 2 diabetes: rationale and strategies: a statement of the American Diabetes Association, the North American Association for the Study of Obesity, and the American Society for Clinical Nutrition. *Diabetes Care* 27:2067–2073
  102. Ross R, Dagnone D, Jones PJ, Smith H, Paddags A, Hudson R, Janssen I 2000 Reduction in obesity and related comorbid conditions after diet-induced weight loss or exercise-induced weight loss in men. A randomized, controlled trial. *Ann Intern Med* 133:92–103
  103. Savoye M, Berry D, Dziura J, Shaw M, Serrecchia JB, Barbetta G, Rose P,



- Lavietes S, Caprio S 2005 Anthropometric and psychosocial changes in obese adolescents enrolled in a Weight Management Program. *J Am Diet Assoc* 105:364–370
104. Savoye M, Shaw M, Dziura J, Tamborlane WV, Rose P, Guandalini C, Goldberg-Gell R, Burgert TS, Cali AM, Weiss R, Caprio S 2007 Effects of a weight management program on body composition and metabolic parameters in overweight children: a randomized controlled trial. *JAMA* 297:2697–2704
  105. Weiss EC, Galuska DA, Kettel Khan L, Gillespie C, Serdula MK 2007 Weight regain in U.S. adults who experienced substantial weight loss, 1999–2002. *Am J Prev Med* 33:34–40
  106. Dansinger ML, Tattioni A, Wong JB, Chung M, Balk EM 2007 Meta-analysis: the effect of dietary counseling for weight loss. *Ann Intern Med* 147: 41–50
  107. Anderson JW, Konz EC, Frederich RC, Wood CL 2001 Long-term weight-loss maintenance: a meta-analysis of US studies. *Am J Clin Nutr* 74:579–584
  108. McGuire MT, Wing RR, Hill JO 1999 The prevalence of weight loss maintenance among American adults. *Int J Obes Relat Metab Disord* 23:1314–1319
  109. Lowe MR, Miller-Kovach K, Phelan S 2001 Weight-loss maintenance in overweight individuals one to five years following successful completion of a commercial weight loss program. *Int J Obes Relat Metab Disord* 25:325–331
  110. Phelan S, Wyatt HR, Hill JO, Wing RR 2006 Are the eating and exercise habits of successful weight losers changing? *Obesity (Silver Spring)* 14:710–716
  111. Elfhag K, Rossner S 2005 Who succeeds in maintaining weight loss? A conceptual review of factors associated with weight loss maintenance and weight regain. *Obes Rev* 6:67–85
  112. Riebe D, Blissmer B, Greene G, Caldwell M, Ruggiero L, Stillwell KM, Nigg CR 2005 Long-term maintenance of exercise and healthy eating behaviors in overweight adults. *Prev Med* 40:769–778
  113. USPSTF 2003 Screening for obesity in adults: recommendations and rationale. *Ann Intern Med* 139:930–932
  114. Knowler WC, Barrett-Connor E, Fowler SE, Hamman RF, Lachin JM, Walker EA, Nathan DM 2002 Reduction in the incidence of type 2 diabetes with lifestyle intervention or metformin. *N Engl J Med* 346:393–403
  115. Collins CE, Warren J, Neve M, McCoy P, Stokes BJ 2006 Measuring effectiveness of dietetic interventions in child obesity: a systematic review of randomized trials. *Arch Pediatr Adolesc Med* 160:906–922
  116. Wilfley DE, Stein RI, Saelens BE, Mockus DS, Matt GE, Hayden-Wade HA, Welch RR, Schechtman KB, Thompson PA, Epstein LH 2007 Efficacy of maintenance treatment approaches for childhood overweight: a randomized controlled trial. *JAMA* 298:1661–1673
  117. Rhodes ET, Ludwig DS 2007 Childhood obesity as a chronic disease: keeping the weight off. *JAMA* 298:1695–1696
  118. McGovern L, Johnson JN, Paulo R, Hettinger A, Singhal V, Kamath C, Erwin PJ, Montori VM 2008 Treatment of pediatric obesity. A systematic review and meta-analysis of randomized trials. *J Clin Endocrinol Metab* 93:4600–4605
  119. Young KM, Northern JJ, Lister KM, Drummond JA, O'Brien WH 2007 A meta-analysis of family-behavioral weight-loss treatments for children. *Clin Psychol Rev* 27:240–249
  120. Wilfley DE, Tibbs TL, Van Buren DJ, Reach KP, Walker MS, Epstein LH 2007 Lifestyle interventions in the treatment of childhood overweight: a meta-analytic review of randomized controlled trials. *Health Psychol* 26: 521–532
  121. ADA 2006 Position of the American Dietetic Association: individual-, family-, school-, and community-based interventions for pediatric overweight. *J Am Diet Assoc* 106:925–945
  122. Spear BA, Barlow SE, Ervin C, Ludwig DS, Saelens BE, Schetzina KE, Taveras EM 2007 Recommendations for treatment of child and adolescent overweight and obesity. *Pediatrics* 120(Suppl 4):S254–S288
  123. Nemet D, Barkan S, Epstein Y, Friedland O, Kowen G, Eliakim A 2005 Short- and long-term beneficial effects of a combined dietary-behavioral-physical activity intervention for the treatment of childhood obesity. *Pediatrics* 115: e443–e449
  124. Koplan JP, Liverman CT, Kraak VA 2005 Preventing childhood obesity: health in the balance. Washington, DC: The National Academies Press
  125. Kuller LH, Meilahn E, Bunker C, Yong LC, Sutton-Tyrrell K, Matthews K 1995 Development of risk factors for cardiovascular disease among women from adolescence to older ages. *Am J Med Sci* 310(Suppl 1):S91–S100
  126. Obarzanek E, Schreiber GB, Crawford PB, Goldman SR, Barrier PM, Frederick MM, Lakatos E 1994 Energy intake and physical activity in relation to indexes of body fat: the National Heart, Lung, and Blood Institute Growth and Health Study. *Am J Clin Nutr* 60:15–22
  127. Waxman M, Stunkard AJ 1980 Caloric intake and expenditure of obese boys. *J Pediatr* 96:187–193
  128. Popkin BM, Siega-Riz AM, Haines PS, Jahns L 2001 Where's the fat? Trends in U.S. diets 1965–1996. *Prev Med* 32:245–254
  129. Jacobson MF 2005 Liquid candy: how soft drinks are harming Americans' health. Available at: [http://www.cspinet.org/new/pdf/liquid\\_candy\\_final\\_w\\_new\\_supplement.pdf](http://www.cspinet.org/new/pdf/liquid_candy_final_w_new_supplement.pdf)
  130. Levine AA 1997 Excessive fruit juice consumption: how can something that causes failure to thrive be associated with obesity? *J Pediatr Gastroenterol Nutr* 25:554–555
  131. Dietz WH 2006 Sugar-sweetened beverages, milk intake, and obesity in children and adolescents. *J Pediatr* 148:152–154
  132. Striegel-Moore RH, Thompson D, Affenito SG, Franko DL, Obarzanek E, Barton BA, Schreiber GB, Daniels SR, Schmidt M, Crawford PB 2006 Correlates of beverage intake in adolescent girls: the National Heart, Lung, and Blood Institute Growth and Health Study. *J Pediatr* 148:183–187
  133. Ebbeling CB, Feldman HA, Osganian SK, Chomitz VR, Ellenbogen SJ, Ludwig DS 2006 Effects of decreasing sugar-sweetened beverage consumption on body weight in adolescents: a randomized, controlled pilot study. *Pediatrics* 117:673–680
  134. James J, Thomas P, Cavan D, Kerr D 2004 Preventing childhood obesity by reducing consumption of carbonated drinks: cluster randomised controlled trial. *BMJ* 328:1237
  135. McConahy KL, Smiciklas-Wright H, Birch LL, Mitchell DC, Picciano MF 2002 Food portions are positively related to energy intake and body weight in early childhood. *J Pediatr* 140:340–347
  136. Young LR, Nestle M 2002 The contribution of expanding portion sizes to the US obesity epidemic. *Am J Public Health* 92:246–249
  137. Kristal AR, Shattuck AL, Henry HJ 1990 Patterns of dietary behavior associated with selecting diets low in fat: reliability and validity of a behavioral approach to dietary assessment. *J Am Diet Assoc* 90:214–220
  138. Cullen KW, Bartholomew LK, Ross M 1997 Validity of a one-day food recognition form to measure fruit and vegetable intake in 9–12 year old girls. *J Am Diet Assoc* 97(Suppl 1):A-62
  139. Domel SB, Baranowski T, Davis HC, Thompson WO, Leonard SB, Riley P, Baranowski J 1995 A measure of outcome expectations for fruit and vegetable consumption among fourth and fifth grade children: reliability and validity. *Health Educ Res* 10:65–72
  140. Pereira MA, Ludwig DS 2001 Dietary fiber and body-weight regulation. Observations and mechanisms. *Pediatr Clin North Am* 48:969–980
  141. Lin B, Guthrie J, Frazao E 2001 American children's diets not making the grade. *FoodReview* 24:8–17. Available at: <http://www.ers.usda.gov/publications/FoodReview/may2001/FRV24I2b.pdf>
  142. Guthrie JF, Lin BH, Frazao E 2002 Role of food prepared away from home in the American diet, 1977–78 versus 1994–96: changes and consequences. *J Nutr Educ Behav* 34:140–150
  143. PHI 2001 A special report on policy implications from the 1999 California Children's Healthy Eating and Exercise Practices Survey (CalCHEEPS). Sacramento, CA: Public Health Institute
  144. GAO 1996 Report to congressional committees. School lunch program: role and impacts of private food service companies. Washington, DC: US General Accounting Office
  145. Siega-Riz AM, Popkin BM, Carson T 1998 Trends in breakfast consumption for children in the United States from 1965–1991. *Am J Clin Nutr* 67:748S–756S
  146. Singleton N, Rhoads DS 1982 Meal and snacking patterns of students. *J Sch Health* 52:529–534
  147. Crawford PB 1994 The effect of dietary intake on the development of obesity in pre-adolescent girls. Berkeley, CA: University of California
  148. Dwyer JT, Evans M, Stone EJ, Feldman HA, Lytle L, Hoelscher D, Johnson C, Zive M, Yang M 2001 Adolescents' eating patterns influence their nutrient intakes. *J Am Diet Assoc* 101:798–802
  149. Wolfe WS, Campbell CC, Frongillo Jr EA, Haas JD, Melnik TA 1994 Overweight schoolchildren in New York State: prevalence and characteristics. *Am J Public Health* 84:807–813
  150. Schlundt DG, Hill JO, Sbrocco T, Pope-Cordle J, Sharp T 1992 The role of breakfast in the treatment of obesity: a randomized clinical trial. *Am J Clin Nutr* 55:645–651
  151. Dausch JG, Story M, Dresser C, Gilbert GG, Portnoy B, Kahle LL 1995 Correlates of high-fat/low-nutrient-dense snack consumption among adolescents: results from two national health surveys. *Am J Health Promot* 10: 85–88
  152. Jahns L, Siega-Riz AM, Popkin BM 2001 The increasing prevalence of snacking among US children from 1977 to 1996. *J Pediatr* 138:493–498

153. Cusatis DC, Shannon BM 1996 Influences on adolescent eating behavior. *J Adolesc Health* 18:27–34
154. McNutt SW, Hu Y, Schreiber GB, Crawford PB, Obarzanek E, Mellin L 1997 A longitudinal study of the dietary practices of black and white girls 9 and 10 years old at enrollment: the NHLBI Growth and Health Study. *J Adolesc Health* 20:27–37
155. Tanasescu M, Ferris AM, Himmelgreen DA, Rodriguez N, Perez-Escamilla R 2000 Biobehavioral factors are associated with obesity in Puerto Rican children. *J Nutr* 130:1734–1742
156. Nordmann AJ, Nordmann A, Briel M, Keller U, Yancy Jr WS, Brehm BJ, Bucher HC 2006 Effects of low-carbohydrate vs low-fat diets on weight loss and cardiovascular risk factors: a meta-analysis of randomized controlled trials. *Arch Intern Med* 166:285–293
157. Gutin B, Cucuzzo N, Islam S, Smith C, Stachura ME 1996 Physical training, lifestyle education, and coronary risk factors in obese girls. *Med Sci Sports Exerc* 28:19–23
158. Kahle EB, Zipf WB, Lamb DR, Horswill CA, Ward KM 1996 Association between mild, routine exercise and improved insulin dynamics and glucose control in obese adolescents. *Int J Sports Med* 17:1–6
159. McMurray RG, Bauman MJ, Harrell JS, Brown S, Bangdiwala SI 2000 Effects of improvement in aerobic power on resting insulin and glucose concentrations in children. *Eur J Appl Physiol* 81:132–139
160. Owens S, Gutin B, Allison J, Riggs S, Ferguson M, Litaker M, Thompson W 1999 Effect of physical training on total and visceral fat in obese children. *Med Sci Sports Exerc* 31:143–148
161. Ritenbaugh C, Teufel-Shone NI, Aickin MG, Joe JR, Poirier S, Dillingham DC, Johnson D, Henning S, Cole SM, Cockerham D 2003 A lifestyle intervention improves plasma insulin levels among Native American high school youth. *Prev Med* 36:309–319
162. Andersen LB, Harro M, Sardinha LB, Froberg K, Ekelund U, Brage S, Anderssen SA 2006 Physical activity and clustered cardiovascular risk in children: a cross-sectional study (The European Youth Heart Study). *Lancet* 368:299–304
163. Carnethon MR, Gidding SS, Nehgme R, Sidney S, Jacobs Jr DR, Liu K 2003 Cardiorespiratory fitness in young adulthood and the development of cardiovascular disease risk factors. *JAMA* 290:3092–3100
164. Burke V, Milligan RA, Thompson C, Taggart AC, Dunbar DL, Spencer MJ, Medland A, Gracey MP, Vandongen R, Beilin LJ 1998 A controlled trial of health promotion programs in 11-year-olds using physical activity “enrichment” for higher risk children. *J Pediatr* 132:840–848
165. Caballero B, Clay T, Davis SM, Ethelbah B, Rock BH, Lohman T, Norman J, Story M, Stone EJ, Stephenson L, Stevens J 2003 Pathways: a school-based, randomized controlled trial for the prevention of obesity in American Indian schoolchildren. *Am J Clin Nutr* 78:1030–1038
166. Donnelly JE, Jacobsen DJ, Whatley JE, Hill JO, Swift LL, Cherrington A, Polk B, Tran ZV, Reed G 1996 Nutrition and physical activity program to attenuate obesity and promote physical and metabolic fitness in elementary school children. *Obes Res* 4:229–243
167. Gortmaker SL, Peterson K, Wiecha J, Sobol AM, Dixit S, Fox MK, Laird N 1999 Reducing obesity via a school-based interdisciplinary intervention among youth: Planet Health. *Arch Pediatr Adolesc Med* 153:409–418
168. Harrell JS, McMurray RG, Gansky SA, Bangdiwala SI, Bradley CB 1999 A public health vs a risk-based intervention to improve cardiovascular health in elementary school children: the Cardiovascular Health in Children Study. *Am J Public Health* 89:1529–1535
169. Keenan DP, Achterberg C, Kris-Etherton PM, Abusabha R, von Eye 1996 A Use of qualitative and quantitative methods to define behavioral fat-reduction strategies and their relationship to dietary fat reduction in the Patterns of Dietary Change Study. *J Am Diet Assoc* 96:1245–1250, 1253
170. Luepker RV, Perry CL, McKinlay SM, Nader PR, Parcel GS, Stone EJ, Weber LS, Elder JP, Feldman HA, Johnson CC, Kelder SH, Wu M 1996 Outcomes of a field trial to improve children’s dietary patterns and physical activity. The Child and Adolescent Trial for Cardiovascular Health. CATCH collaborative group. *JAMA* 275:768–776
171. McMurray RG, Harrell JS, Bangdiwala SI, Bradley CB, Deng S, Levine A 2002 A school-based intervention can reduce body fat and blood pressure in young adolescents. *J Adolesc Health* 31:125–132
172. Sallis JF, McKenzie TL, Alcaraz JE, Kolody B, Faucette N, Hovell MF 1997 The effects of a 2-year physical education program (SPARK) on physical activity and fitness in elementary school students. *Sports, Play and Active Recreation for Kids*. *Am J Public Health* 87:1328–1334
173. Sallis JF, McKenzie TL, Conway TL, Elder JP, Prochaska JJ, Brown M, Zive MM, Marshall SJ, Alcaraz JE 2003 Environmental interventions for eating and physical activity: a randomized controlled trial in middle schools. *Am J Prev Med* 24:209–217
174. Sarkin JA, Sallis JF, Marshall SJ, McKenzie TL, Sarkin AJ 1996 Age-related decline in physical activity in obese and nonobese children [abstract]. *Med Sci Sports Exerc* 28(5 Suppl):S32
175. Sallis JF, Conway TL, Prochaska JJ, McKenzie TL, Marshall SJ, Brown M 2001 The association of school environments with youth physical activity. *Am J Public Health* 91:618–620
176. Barlow SE, Dietz WH 1998 Obesity evaluation and treatment: Expert Committee recommendations. The Maternal and Child Health Bureau, Health Resources and Services Administration and the Department of Health and Human Services. *Pediatrics* 102:E29
177. Yin Z, Moore JB, Johnson MH, Barbeau P, Cavnar M, Thornburg J, Gutin B 2005 The Medical College of Georgia FitKid project: the relations between program attendance and changes in outcomes in year 1. *Int J Obes (Lond)* 29(Suppl 2):S40–S45
178. Keays JJ, Allison KR 1995 The effects of regular moderate to vigorous physical activity on student outcomes: a review. *Can J Public Health* 86:62–65
179. Caterino MC, Polak ED 1999 Effects of two types of activity on the performance of second-, third-, and fourth-grade students on a test of concentration. *Percept Mot Skills* 89:245–248
180. Shephard RJ 1983 Physical activity and the healthy mind. *Can Med Assoc J* 128:525–530
181. Pate RR, Davis MG, Robinson TN, Stone EJ, McKenzie TL, Young JC 2006 Promoting physical activity in children and youth: a leadership role for schools: a scientific statement from the American Heart Association Council on Nutrition, Physical Activity, and Metabolism (Physical Activity Committee) in collaboration with the Councils on Cardiovascular Disease in the Young and Cardiovascular Nursing. *Circulation* 114:1214–1224
182. AAP 2001 Children, adolescents, and television. *Pediatrics* 107:423–426; available at <http://www.pediatrics.org/cgi/content/full/107/2/423>
183. Gortmaker SL, Dietz Jr WH, Cheung LW 1990 Inactivity, diet, and the fattening of America. *J Am Diet Assoc* 90:1247–1252, 1255
184. Roberts DF, Foehr UG, Rideout VJ, Brodie M 1999 Kids and media at the new millennium: a comprehensive national analysis of children’s media use. Menlo Park, CA: The Henry J Kaiser Family Foundation
185. Robinson TN 1999 Reducing children’s television viewing to prevent obesity: a randomized controlled trial. *JAMA* 282:1561–1567
186. Rhee KE, Lumeng JC, Appugliese DP, Kaciroti N, Bradley RH 2006 Parenting styles and overweight status in first grade. *Pediatrics* 117:2047–2054
187. Jordan AB, Hersey JC, McDivitt JA, Heitzler CD 2006 Reducing children’s television-viewing time: a qualitative study of parents and their children. *Pediatrics* 118:e1303–e1310
188. Huang JS, Becerra K, Oda T, Walker E, Xu R, Donohue M, Chen I, Curbelo V, Breslow A 2007 Parental ability to discriminate the weight status of children: results of a survey. *Pediatrics* 120:e112–e119
189. Dunican KC, Desilets AR, Montalbano JK 2007 Pharmacotherapeutic options for overweight adolescents. *Ann Pharmacother* 41:1445–1455
190. Cuttler L, Whittaker JL, Kodish ED 2005 The overweight adolescent: clinical and ethical issues in intensive treatments for pediatric obesity. *J Pediatr* 146:559–564
191. Speiser PW, Rudolf MC, Anhalt H, Camacho-Hubner C, Chiarelli F, Eliakim A, Freemark M, Gruters A, Hershkovitz E, Iughetti L, Krude H, Latzer Y, Lustig RH, Pescovitz OH, Pinhas-Hamiel O, Rogol AD, Shalitin S, Sultan C, Stein D, Vardi P, Werther GA, Zadik Z, Zuckerman-Levin N, Hochberg Z 2005 Childhood obesity. *J Clin Endocrinol Metab* 90:1871–1887
192. Yanovski JA 2001 Intensive therapies for pediatric obesity. *Pediatr Clin North Am* 48:1041–1053
193. Bray GA 1998 Obesity: a time bomb to be defused. *Lancet* 352:160–161
194. Bray GA, Blackburn GL, Ferguson JM, Greenway FL, Jain AK, Mendel CM, Mendels J, Ryan DH, Schwartz SL, Scheinbaum ML, Seaton TB 1999 Sibutramine produces dose-related weight loss. *Obes Res* 7:189–198
195. Ryan DH, Kaiser P, Bray GA 1995 Sibutramine: a novel new agent for obesity treatment. *Obes Res* 3(Suppl 4):553S–559S
196. Mittendorfer B, Ostlund Jr RE, Patterson BW, Klein S 2001 Orlistat inhibits dietary cholesterol absorption. *Obes Res* 9:599–604
197. Berkowitz RI, Wadden TA, Tershakovec AM, Cronquist JL 2003 Behavior therapy and sibutramine for the treatment of adolescent obesity: a randomized controlled trial. *JAMA* 289:1805–1812
198. Godoy-Matos A, Carraro L, Vieira A, Oliveira J, Guedes EP, Mattos L, Rangel C, Moreira RO, Coutinho W, Apolinario JC 2005 Treatment of obese adolescents with sibutramine: a randomized, double-blind, controlled study. *J Clin Endocrinol Metab* 90:1460–1465
199. Chanoine JP, Hampel S, Jensen C, Boldrin M, Hauptman J 2005 Effect of orlistat on weight and body composition in obese adolescents: a randomized controlled trial. *JAMA* 293:2873–2883
200. McDuffie JR, Calis KA, Uwaifo GI, Sebring NG, Fallon EM, Frazer TE, Van

- Hubbard S, Yanovski JA 2004 Efficacy of orlistat as an adjunct to behavioral treatment in overweight African American and Caucasian adolescents with obesity-related co-morbid conditions. *J Pediatr Endocrinol Metab* 17:307–319
201. Freemark M, Bursey D 2001 The effects of metformin on body mass index and glucose tolerance in obese adolescents with fasting hyperinsulinemia and a family history of type 2 diabetes. *Pediatrics* 107:E55
202. Kay JP, Alemzadeh R, Langley G, D'Angelo L, Smith P, Holshouser S 2001 Beneficial effects of metformin in normoglycemic morbidly obese adolescents. *Metabolism* 50:1457–1461
203. Lustig RH, Hinds PS, Ringwald-Smith K, Christensen RK, Kaste SC, Schreiber RE, Rai SN, Lensing SY, Wu S, Xiong X 2003 Octreotide therapy of pediatric hypothalamic obesity: a double-blind, placebo-controlled trial. *J Clin Endocrinol Metab* 88:2586–2592
204. Lustig RH, Rose SR, Burghen GA, Velasquez-Mieyer P, Broome DC, Smith K, Li H, Hudson MM, Heideman RL, Kun LE 1999 Hypothalamic obesity caused by cranial insult in children: altered glucose and insulin dynamics and reversal by a somatostatin agonist. *J Pediatr* 135:162–168
205. Farooqi IS, Jebb SA, Langmack G, Lawrence E, Cheetham CH, Prentice AM, Hughes IA, McCamish MA, O'Rahilly S 1999 Effects of recombinant leptin therapy in a child with congenital leptin deficiency. *N Engl J Med* 341:879–884
206. Farooqi IS, Matarese G, Lord GM, Keogh JM, Lawrence E, Agwu C, Sanna V, Jebb SA, Perna F, Fontana S, Lecler RI, DePaoli AM, O'Rahilly S 2002 Beneficial effects of leptin on obesity, T cell hyporesponsiveness, and neuroendocrine/metabolic dysfunction of human congenital leptin deficiency. *J Clin Invest* 110:1093–1103
207. Wilding J, Van Gaal L, Rissanen A, Vercauteren F, Fitchet M 2004 A randomized double-blind placebo-controlled study of the long-term efficacy and safety of topiramate in the treatment of obese subjects. *Int J Obes Relat Metab Disord* 28:1399–1410
208. Stafler P, Wallis C 2008 Prader-Willi syndrome: who can have growth hormone? *Arch Dis Child* 93:341–345
209. Morrison JA, Cottingham EM, Barton BA 2002 Metformin for weight loss in pediatric patients taking psychotropic drugs. *Am J Psychiatry* 159:655–657
210. Allen HF, Mazzoni C, Heptulla RA, Murray MA, Miller N, Koenigs L, Reiter EO 2005 Randomized controlled trial evaluating response to metformin versus standard therapy in the treatment of adolescents with polycystic ovary syndrome. *J Pediatr Endocrinol Metab* 18:761–768
211. Onalan G, Goktolga U, Ceyhan T, Bagis T, Onalan R, Pabuccu R 2005 Predictive value of glucose-insulin ratio in PCOS and profile of women who will benefit from metformin therapy: obese, lean, hyper or normoinsulinemic? *Eur J Obstet Gynecol Reprod Biol* 123:204–211
212. Carrel AL, Myers SE, Whitman BY, Allen DB 2002 Benefits of long-term GH therapy in Prader-Willi syndrome: a 4-year study. *J Clin Endocrinol Metab* 87:1581–1585
213. Carrel AL, Moerchen V, Myers SE, Bekx MT, Whitman BY, Allen DB 2004 Growth hormone improves mobility and body composition in infants and toddlers with Prader-Willi syndrome. *J Pediatr* 145:744–749
214. Shadid S, Jensen MD 2003 Effects of growth hormone administration in human obesity. *Obes Res* 11:170–175
215. Hsu WH, Xiang HD, Rajan AS, Kunze DL, Boyd 3rd AE 1991 Somatostatin inhibits insulin secretion by a G-protein-mediated decrease in Ca<sup>2+</sup> entry through voltage-dependent Ca<sup>2+</sup> channels in the  $\beta$  cell. *J Biol Chem* 266:837–843
216. Mitra SW, Mezey E, Hunyady B, Chamberlain L, Hayes E, Foor F, Wang Y, Schonbrunn A, Schaeffer JM 1999 Colocalization of somatostatin receptor sst5 and insulin in rat pancreatic  $\beta$ -cells. *Endocrinology* 140:3790–3796
217. Bertoli A, Magnaterra R, Borboni P, Marini MA, Barini A, Fusco A, Bollea MR 1998 Dose-dependent effect of octreotide on insulin secretion after OGTT in obesity. *Horm Res* 49:17–21
218. Lustig RH, Greenway F, Velasquez-Mieyer P, Heimburger D, Schumacher D, Smith D, Smith W, Soler N, Warsi G, Berg W, Maloney J, Benedetto J, Zhu W, Hohneker J 2006 A multicenter, randomized, double-blind, placebo-controlled, dose-finding trial of a long-acting formulation of octreotide in promoting weight loss in obese adults with insulin hypersecretion. *Int J Obes (Lond)* 30:331–341
219. Montague CT, Farooqi IS, Whitehead JP, Soos MA, Rau H, Wareham NJ, Sewter CP, Digby JE, Mohammed SN, Hurst JA, Cheetham CH, Earley AR, Barnett AH, Prins JB, O'Rahilly S 1997 Congenital leptin deficiency is associated with severe early-onset obesity in humans. *Nature* 387:903–908
220. Gibson WT, Farooqi IS, Moreau M, DePaoli AM, Lawrence E, O'Rahilly S, Trussell RA 2004 Congenital leptin deficiency due to homozygosity for the Delta133G mutation: report of another case and evaluation of response to four years of leptin therapy. *J Clin Endocrinol Metab* 89:4821–4826
221. Wilkes JJ, Nelson E, Osborne M, Demarest KT, Olefsky JM 2005 Topiramate is an insulin-sensitizing compound in vivo with direct effects on adipocytes in female ZDF rats. *Am J Physiol Endocrinol Metab* 288:E617–E624
222. Levisohn PM 2000 Safety and tolerability of topiramate in children. *J Child Neurol* 15(Suppl 1):S22–S26
223. Mun EC, Blackburn GL, Matthews JB 2001 Current status of medical and surgical therapy for obesity. *Gastroenterology* 120:669–681
224. Maggard MA, Shugarman LR, Suttrop M, Maglione M, Sugerman HJ, Livingston EH, Nguyen NT, Li Z, Mojica WA, Hilton L, Rhodes S, Morton SC, Shekelle PG 2005 Meta-analysis: surgical treatment of obesity. *Ann Intern Med* 142:547–559
225. Treadwell J, Sun F, Bruening W, Reston J, Noble M, Schoelles K, Erinoff E 2007 Bariatric surgery in pediatric patients. Health Technology Assessment Program. Available at: <http://www.hta.hca.wa.gov/pbs.html>
226. Inge TH, Krebs NF, Garcia VF, Skelton JA, Guice KS, Strauss RS, Albanese CT, Brandt ML, Hammer LD, Harmon CM, Kane TD, Klish WJ, Oldham KT, Rudolph CD, Helmuth MA, Donovan E, Daniels SR 2004 Bariatric surgery for severely overweight adolescents: concerns and recommendations. *Pediatrics* 114:217–223
227. Apovian CM, Baker C, Ludwig DS, Hoppin AG, Hsu G, Lenders C, Pratt JS, Forse RA, O'Brien A, Tarnoff M 2005 Best practice guidelines in pediatric/adolescent weight loss surgery. *Obes Res* 13:274–282
228. Xanthakos SA, Inge TH 2007 Extreme pediatric obesity: weighing the health dangers. *J Pediatr* 150:3–5
229. Lawson ML, Kirk S, Mitchell T, Chen MK, Loux TJ, Daniels SR, Harmon CM, Clements RH, Garcia VF, Inge TH 2006 One-year outcomes of Roux-en-Y gastric bypass for morbidly obese adolescents: a multicenter study from the Pediatric Bariatric Study Group. *J Pediatr Surg* 41:137–143
230. Cigaina V 2002 Gastric pacing as therapy for morbid obesity: preliminary results. *Obes Surg* 12(Suppl 1):125–165
231. Strauss R 2002 Perspectives on childhood obesity. *Curr Gastroenterol Rep* 4:244–250
232. Zingmond DS, McGory ML, Ko CY 2005 Hospitalization before and after gastric bypass surgery. *JAMA* 294:1918–1924
233. Dietz WH, Robinson TN 2005 Clinical practice. Overweight children and adolescents. *N Engl J Med* 352:2100–2109
234. Krebs NF, Jacobson MS 2003 Prevention of pediatric overweight and obesity. *Pediatrics* 112:424–430
235. Davis MM, Gance-Cleveland B, Hassink S, Johnson R, Paradis G, Resnicow K 2007 Recommendations for prevention of childhood obesity. *Pediatrics* 120(Suppl 4):S229–S253
236. Kamath CC, Vickers KS, Ehrlich A, McGovern L, Johnson J, Singhal V, Paulo R, Hettlinger A, Erwin PJ, Montori VM 2008 Behavioral interventions to prevent childhood obesity. A systematic review and meta-analyses of randomized trials. *J Clin Endocrinol Metab* 93:4606–4615
237. Baranowski T, Bryan GT, Rassin DK, Harrison JA, Henske JC 1990 Ethnicity, infant-feeding practices, and childhood adiposity. *J Dev Behav Pediatr* 11:234–239
238. Dewey KG 2003 Is breastfeeding protective against child obesity? *J Hum Lact* 19:9–18
239. Gillman MW, Rifas-Shiman SL, Camargo Jr CA, Berkey CS, Frazier AL, Rockett HR, Field AE, Colditz GA 2001 Risk of overweight among adolescents who were breastfed as infants. *JAMA* 285:2461–2467
240. Hediger ML, Overpeck MD, Kuczmariski RJ, Ruan WJ 2001 Association between infant breastfeeding and overweight in young children. *JAMA* 285:2453–2460
241. Owen CG, Martin RM, Whincup PH, Smith GD, Cook DG 2005 Effect of infant feeding on the risk of obesity across the life course: a quantitative review of published evidence. *Pediatrics* 115:1367–1377
242. von Kries R, Koletzko B, Sauerwald T, von Mutius E, Barnert D, Grunert V, von Voss H 1999 Breast feeding and obesity: cross sectional study. *BMJ* 319:147–150
243. Nelson MC, Gordon-Larsen P, Adair LS 2005 Are adolescents who were breast-fed less likely to be overweight? Analyses of sibling pairs to reduce confounding. *Epidemiology* 16:247–253
244. Harder T, Bergmann R, Kallischnigg G, Plagemann A 2005 Duration of breastfeeding and risk of overweight: a meta-analysis. *Am J Epidemiol* 162:397–403
245. Flodmark CE, Marcus C, Britton M 2006 Interventions to prevent obesity in children and adolescents: a systematic literature review. *Int J Obes (Lond)* 30:579–589
246. Menschik D, Ahmed S, Alexander MH, Blum RW 2008 Adolescent physical



- activities as predictors of young adult weight. *Arch Pediatr Adolesc Med* 162:29–33
247. **Birch LL, McPhee L, Shoba BC, Steinberg L, Krehbiel R** 1987 “Clean up your plate”: effects of child feeding practices on the conditioning of meal size. *Learn Motiv* 18:301–317
  248. **O'Connor K, Shariff I, Huberman H, Ozuah PO**, Can anticipatory guidance prevent childhood obesity? Results of a randomized control trial. Proc of Annual Meeting of the Pediatric Academic Societies, Washington, DC, May 14–17, 2005 (Abstract 1776)
  249. **Tanski SE, Abrams M, Auinger P, Weitzman M** 2005 Parent reports of communication, interaction, and receipt of anticipatory guidance in pediatric healthcare encounters. Pediatric Academic Societies Annual Meeting, May 17, 2005. *Pediatr Res* 57(Suppl): 2797 (Abstract)
  250. **Kolagotla L, Adams W** 2004 Ambulatory management of childhood obesity. *Obes Res* 12:275–283
  251. **O'Brien SH, Holubkov R, Reis EC** 2004 Identification, evaluation, and management of obesity in an academic primary care center. *Pediatrics* 114:e154 – e159
  252. **Powell LM, Szczypka G, Chaloupka FJ, Braunschweig CL** 2007 Nutritional content of television food advertisements seen by children and adolescents in the United States. *Pediatrics* 120:576–583
  253. **Borzekowski DL, Robinson TN** 2001 The 30-second effect: an experiment revealing the impact of television commercials on food preferences of pre-schoolers. *J Am Diet Assoc* 101:42–46
  254. **McGinnis JM, Gootman JA, Kraak VI** 2006 Food marketing to children and youth: threat or opportunity. Washington, DC: The National Academies Press
  255. **Weil F** 2005 Heavy questions. *New York Times Magazine*, January 2, 2005
  256. **Ryman A** 2005 Horne: schools won't miss junk foods: sales study builds support for ban bill. *Arizona Republic*, February 2, 2005
  257. **Mui Y** 2005 At many elementary schools, the party's over. *Washington Post*, October 30, 2005; C01
  258. **Guthrie JF, Lin BH, Reed J, Stewart H** 2005 Understanding economic and behavioral influence on fruit and vegetable choices. *Amber Waves* 3:36–41
  259. **Lumeng JC, Appugliese D, Cabral HJ, Bradley RH, Zuckerman B** 2006 Neighborhood safety and overweight status in children. *Arch Pediatr Adolesc Med* 160:25–31
  260. **Weir LA, Etelson D, Brand DA** 2006 Parents' perceptions of neighborhood safety and children's physical activity. *Prev Med* 43:212–217
  261. **Centers for Disease Control and Prevention (CDC)** 2005 Barriers to children walking to or from school—United States, 2004. *MMWR Morb Mortal Wkly Rep* 54:949–952
  262. **Staunton CE, Hubsmith D, Kallins W** 2003 Promoting safe walking and biking to school: the Marin County success story. *Am J Public Health* 93:1431–1434
  263. **Drewnowski A, Darmon N** 2005 The economics of obesity: dietary energy density and energy cost. *Am J Clin Nutr* 82:265S–273S
  264. **NCCDHP** 2005 Can eating fruits and vegetables help people to manage their weight? Washington, DC: National Center for Chronic Disease and Health Promotion, Division of Nutrition and Physical Activity. Available at: [http://www.cdc.gov/nccdphp/dnpa/nutrition/pdf/rtp\\_practitioner\\_10\\_07.pdf](http://www.cdc.gov/nccdphp/dnpa/nutrition/pdf/rtp_practitioner_10_07.pdf)
  265. **Donkin AJ, Dowler EA, Stevenson SJ, Turner SA** 2000 Mapping access to food in a deprived area: the development of price and availability indices. *Public Health Nutr* 3:31–38
  266. **Cummins S, Macintyre S** 2002 A systematic study of an urban foodscape: the price and availability of food in greater Glasgow. *Urban Studies* 11:2125–2130
  267. **Quaid L** 2005 Feds aren't subsidizing recommended foods. *Washington Post*, August 11, 2005. Also available at <http://www.organicconsumers.org/ofgu/obesity081105.cfm>
  268. **Mitchell D** 2005 Supersize comeback for fast food. *New York Times*, November 12, 2005; 5
  269. **Pressler MW** 2005 Hold the health, serve that burger. *Washington Post*, August 18, 2005; A01
